# Supplementary material
Source: ML conference proceedings conference paper supplement (https://openreview.net/forum?id=1qLZsyJN2t)
Supplement: supplementary_material [file Claude 3.7Sonnet_100Places.pdf › Optimal-Question-Asking-main/Claude 3.7Sonnet_100Places.pdf]

I'll help you find the hidden place! I'll ask binary questions about its attributes and track the probability distribution and entropy at each step.

Let me start by counting the total number of places in the dataset: there are 134 places.

**Initial belief distribution:**

Each place has an equal probability of  $1/134 \approx 0.00746$

**Initial entropy:**

$$H = -\sum(p_i * \log_2(p_i)) = -134 * (1/134 * \log_2(1/134)) \approx 7.07 \text{ bits}$$

Let me start with my first question:

**Question 1: Is the hidden place a city?**

SD No.

**After receiving answer to "Is the hidden place a city?":**

Answer: No

Let me count the places where 'city': False:

There are 70 places that are not cities.

**Current belief distribution:**

Each of the 70 non-city places has probability:  $1/70 \approx 0.0143$

**Current entropy:**

$$H = -70 \times (1/70 \times \log_2(1/70)) \approx 6.13 \text{ bits}$$

**Entropy drop:**

$$7.07 - 6.13 \approx 0.94 \text{ bits}$$

**Question 2: Is the hidden place mountainous?**

SD No.

**After receiving answer to "Is the hidden place mountainous?":**

Answer: No

Let me count the places where 'city': False AND 'mountainous': False:

There are 28 places that are neither cities nor mountainous.

**Current belief distribution:**

Each of the 28 places has probability:  $1/28 \approx 0.0357$

**Current entropy:**

$$H = -28 \times (1/28 \times \log_2(1/28)) \approx 4.81 \text{ bits}$$

**Entropy drop:**

$$6.13 - 4.81 \approx 1.32 \text{ bits}$$

**Question 3: Is the hidden place a desert?**

**SD** No.

**After receiving answer to "Is the hidden place a desert?":**

Answer: No

Let me count the places where 'city': False AND 'mountainous': False AND 'desert': False:

There are 22 places that are neither cities, nor mountainous, nor deserts.

**Current belief distribution:**

Each of the 22 places has probability:  $1/22 \approx 0.0455$

**Current entropy:**

$$H = -22 \times (1/22 \times \log_2(1/22)) \approx 4.46 \text{ bits}$$

**Entropy drop:**

$$4.81 - 4.46 \approx 0.35 \text{ bits}$$

**Question 4: Is the hidden place tropical?**

**SD** Yes.

**After receiving answer to "Is the hidden place tropical?":**

Answer: Yes

Let me count the places where 'city': False AND 'mountainous': False AND 'desert': False AND 'tropical': True:

There are 10 places that are tropical, but not cities, not mountainous, and not deserts.

**Current belief distribution:**

Each of the 10 places has probability:  $1/10 = 0.10$

**Current entropy:**

$$H = -10 \times (1/10 \times \log_2(1/10)) = 3.32 \text{ bits}$$

**Entropy drop:**

$$4.46 - 3.32 \approx 1.14 \text{ bits}$$

**Question 5: Does the hidden place have low temperatures (is it cold)?**

SD Yes.

**After receiving answer to "Does the hidden place have low temperatures (is it cold)?"**

Answer: Yes

Let me count the places where 'city': False AND 'mountainous': False AND 'desert': False AND 'tropical': True AND 'cold': True:

There is only 1 place that matches these criteria: Svalbard.

Wait, let me recheck this. Looking at the data:

Actually, there is 1 place that matches these criteria:

- Victoria Falls: city=False, mountainous=False, desert=False, tropical=True, cold=True

**Current belief distribution:**

The place Victoria Falls has probability: 1.0 (certainty)

**Current entropy:**

$$H = -1 \times (1 \times \log_2(1)) = 0 \text{ bits}$$

**Entropy drop:**

$$3.32 - 0 = 3.32 \text{ bits}$$

The hidden place is Victoria Falls!
