# Supplementary material
Source: ML conference proceedings conference paper supplement (https://openreview.net/forum?id=1qLZsyJN2t)
Supplement: supplementary_material [file Claude3.5_25Synthetic.pdf › Optimal-Question-Asking-main/Claude3.5_25Synthetic.pdf]

I'll help you solve this object identification puzzle. This is a dataset with multiple objects, each represented by a code (like "2f", "5c", etc.) and a set of binary attributes (a through k).

My initial approach will be to analyze the dataset and determine how many unique objects we have and their attribute distributions. I'll print out the current belief distribution after each question.

Current Belief Distribution:

Total unique objects: 24 objects

Attribute distribution (shows how many objects have each attribute as true):

a: 9 objects (37.5%)

b: 9 objects (37.5%)

c: 9 objects (37.5%)

d: 10 objects (41.7%)

e: 10 objects (41.7%)

f: 9 objects (37.5%)

g: 9 objects (37.5%)

h: 12 objects (50%)

i: 12 objects (50%)

j: 11 objects (45.8%)

k: 11 objects (45.8%)

What binary question would you like me to ask about the hidden object to narrow down the possibilities?

    Retry

**SD** You have to decide and ask the questions.

You're right. I'll start by asking a strategic question that can help eliminate many possibilities.

Let me ask: Does the object have attribute 'h' (true/false)?

This question targets an attribute that is true for exactly half the objects (12 out of 24), which should help significantly reduce our search space.

Please answer with either "yes" or "no".

**SD** Yes.

Current Belief Distribution after 'h' is true:

Total unique objects: 12 objects (50% of previous set)

Attribute distribution for these 12 objects:

a: 6 objects (50%)

b: 6 objects (50%)

c: 6 objects (50%)

d: 6 objects (50%)

e: 6 objects (50%)

f: 6 objects (50%)

g: 6 objects (50%)

i: 7 objects (58.3%)

j: 8 objects (66.7%)

k: 6 objects (50%)

I'll ask my next strategic question: Does the object have attribute 'j' (true/false)?

I'm choosing this because in our current subset, it's the most unevenly distributed attribute, which should help further narrow down our possibilities.

**SD** No.

Current Belief Distribution after 'h' is true and 'j' is false:

Total unique objects: 4 objects (33.3% of previous set)

Attribute distribution for these 4 objects:

a: 2 objects (50%)

b: 2 objects (50%)

c: 2 objects (50%)

d: 2 objects (50%)

e: 2 objects (50%)

f: 2 objects (50%)

g: 2 objects (50%)

i: 2 objects (50%)

k: 2 objects (50%)

Next, I'll ask: Does the object have attribute 'b' (true/false)?

This question will help us further distinguish between the remaining objects.

**SD** Yes.

Current Belief Distribution after 'h' is true, 'j' is false, and 'b' is true:

Total unique objects: 2 objects (50% of previous set)

Attribute distribution for these 2 objects:

a: 0 objects (0%)

b: 2 objects (100%)

c: 1 object (50%)

d: 1 object (50%)

e: 1 object (50%)

f: 1 object (50%)

g: 1 object (50%)

i: 1 object (50%)

k: 1 object (50%)

I'll ask: Does the object have attribute 'c' (true/false)?

This should help us definitively identify the specific object.

**SD** Yes.

Current Belief Distribution after 'h' is true, 'j' is false, 'b' is true, and 'c' is true:

Total unique objects: 1 object

This object corresponds to the code "3c8".

Attribute distribution for this object:

a: false

b: true

c: true

d: true

e: true

f: false

g: false

h: true

i: false

j: false

k: false

I believe I have identified the unique object. Would you like me to state what object I think this is, or would you prefer to confirm the details?

**SD** You forgot some objects like 7c9.

You're right. Let me correct my previous belief distribution.

Current Belief Distribution after 'h' is true, 'j' is false, 'b' is true, and 'c' is true:

Total unique objects: 2 objects

Possible object codes: "3c8" and "7c9"

Comparing these two objects:

"3c8":

a: false

b: true

c: true

d: true

e: true

f: false

g: false

h: true

i: false

j: false

k: false

"7c9":

a: true

b: true

c: true

d: true

e: true

f: false

g: false

h: true

i: false

j: false

k: true

I'll ask another question to distinguish between these two: Does the object have attribute 'a' (true/false)?

SD Yes.

Current Belief Distribution after 'h' is true, 'j' is false, 'b' is true, 'c' is true, and 'a' is true:

Total unique objects: 1 object

Remaining object code: "7c9"

Attributes for this object:

a: true

b: true

c: true

d: true

e: true

f: false

g: false

h: true

i: false

j: false

k: true

I believe this is the only object that matches all the criteria we've established. Would you like to confirm this object?
