# Supplementary material
Source: ML conference proceedings conference paper supplement (https://openreview.net/forum?id=1qLZsyJN2t)
Supplement: supplementary_material [file Claude3.5Haiku_25Animals.pdf › Optimal-Question-Asking-main/Claude3.5Haiku_25Animals.pdf]

PASTED

SD

I'll help solve this animal guessing game using a Bayesian reasoning approach. I'll start by asking strategic questions to narrow down the possible animals.

Initial Belief Distribution:

All 28 animals have an equal probability of being the hidden animal ( $1/28 \approx 0.0357$  or 3.57% chance for each).

First Question: Is the hidden animal a mammal?

SD Yes.

Updated Belief Distribution:

Mammalian animals (15 out of 28 total animals):

1. cat (3.57%)
2. dog (3.57%)
3. lion (3.57%)
4. elephant (3.57%)
5. whale (3.57%)
6. kangaroo (3.57%)
7. bat (3.57%)
8. giraffe (3.57%)
9. hippopotamus (3.57%)
10. rhino (3.57%)
11. tiger (3.57%)
12. bear (3.57%)
13. panda (3.57%)
14. cow (3.57%)

15. horse (3.57%)

16. goat (3.57%)

17. monkey (3.57%)

Next Question: Is the hidden animal a carnivore?

**SD** Yes.

Updated Belief Distribution:

Carnivorous mammals (7 out of 28 total animals):

1. cat (14.29%)

2. dog (14.29%)

3. lion (14.29%)

4. whale (14.29%)

5. tiger (14.29%)

6. bear (14.29%)

The probability for each of these has increased to 14.29% because they are the only animals that match both criteria so far.

Next Question: Is the hidden animal domestic?

**SD** No.

Updated Belief Distribution:

Non-domestic carnivorous mammals (4 out of 28 total animals):

1. lion (25%)

2. whale (25%)

3. tiger (25%)

4. bear (25%)

The probability for each of these has increased to 25% as they match all our criteria so far: mammal, carnivore, and not domestic.

Next Question: Is the hidden animal big (large in size)?

SD Yes.

Updated Belief Distribution:

Big, non-domestic, carnivorous mammals (3 out of 28 total animals):

1. lion (33.33%)
2. whale (33.33%)
3. tiger (33.33%)

The probability for each of these has increased to 33.33% as they match all our criteria: mammal, carnivore, not domestic, and big.

Next Question: Does the hidden animal have fur?

SD Yes.

Updated Belief Distribution:

Big, non-domestic, carnivorous mammals with fur (2 out of 28 total animals):

1. lion (50%)
2. tiger (50%)

The probability for each of these has increased to 50%. These are the only animals that match all our criteria so far: mammal, carnivore, not domestic, big, and has fur.

Next Question: Can the hidden animal swim?

SD Yes.

Updated Belief Distribution:

Big, non-domestic, carnivorous mammals with fur that can swim (1 out of 28 total animals):

1. tiger (100%)

The tiger is now the only animal left that matches all of our criteria: mammal, carnivore, not domestic, big, has fur, and can swim.

I believe I know the hidden animal, but I'll ask a final confirming question to be sure.

Is the hidden animal a tiger?
