# Supplementary material
Source: ML conference proceedings conference paper supplement (https://openreview.net/forum?id=1qLZsyJN2t)
Supplement: supplementary_material [file Claude3.5Haiku_25Cars.pdf › Optimal-Question-Asking-main/Claude3.5Haiku_25Cars.pdf]

I'll help solve this car guessing game. The goal is to identify the hidden car by asking binary (yes/no) questions about its attributes. I'll start by calculating the initial belief distribution across all the cars in the dataset.

Initial Belief Distribution:

Total cars in the dataset: 24

Probability for each car initially:  $1/24 \approx 0.0417$  (4.17%)

I'll begin by asking a question that can help narrow down the possibilities efficiently.

Is the car a sedan?

    Retry

**SD** No.

Updated Belief Distribution:

I'll filter out all sedans from the possible cars:

Remaining cars (non-sedans):

1. Mini Cooper
2. Jaguar F-Type
3. Acura NSX
4. Lexus LC 500
5. Audi R8
6. Chevrolet Tahoe
7. Kia Carnival
8. Chevrolet Corvette
9. Rivian R1T
10. Tesla Model Y
11. Jeep Wrangler
12. McLaren Artura
13. Toyota Sienna
14. Lexus RX
15. Volvo XC90
16. Genesis GV80

17. Jeep Grand Cherokee

18. BMW X5

19. Subaru Forester Wilderness

Total remaining cars: 19

New probability for each car:  $1/19 \approx 0.0526$  (5.26%)

My next question will help further narrow down the possibilities:

Is the car a truck?

**SD** No.

Updated Belief Distribution:

I'll remove trucks from the remaining possibilities:

Remaining cars (non-sedans, non-trucks):

1. Mini Cooper
2. Jaguar F-Type
3. Acura NSX
4. Lexus LC 500
5. Audi R8
6. Chevrolet Tahoe
7. Kia Carnival
8. Chevrolet Corvette
9. Tesla Model Y
10. Jeep Wrangler
11. McLaren Artura
12. Toyota Sienna
13. Lexus RX
14. Volvo XC90
15. Genesis GV80
16. Jeep Grand Cherokee
17. BMW X5

## 18. Subaru Forester Wilderness

Total remaining cars: 18

New probability for each car:  $1/18 \approx 0.0556$  (5.56%)

Let's narrow down the possibilities further:

Is the car a coupe?

**SD** Yes.

Updated Belief Distribution:

I'll filter for coupes among the remaining cars:

Remaining cars (non-sedans, non-trucks, coupes):

1. Mini Cooper
2. Jaguar F-Type
3. Acura NSX
4. Lexus LC 500
5. Audi R8
6. Chevrolet Corvette
7. McLaren Artura

Total remaining cars: 7

New probability for each car:  $1/7 \approx 0.1429$  (14.29%)

Next question to help narrow down the possibilities:

Is the car a luxury vehicle?

**SD** No.

Updated Belief Distribution:

I'll filter out luxury cars among the remaining coupes:

Remaining cars (non-sedans, non-trucks, coupes, non-luxury):

1. Mini Cooper
2. Chevrolet Corvette

Total remaining cars: 2

New probability for each car:  $1/2 = 0.5$  (50%)

We're down to two possibilities. Let's try to distinguish between them:

Does the car have 2 seats?

**SD** No.

Updated Belief Distribution:

Based on the criteria:

- Not a sedan
- Not a truck
- Is a coupe
- Not luxury
- Not 2 seats

This leaves us with only one car:

Remaining car: Mini Cooper

The Mini Cooper perfectly matches all the criteria we've established:

- Not a sedan ✓
- Not a truck ✓
- Is a coupe ✓
- Not luxury ✓
- Not 2 seats ✓ (it has 4 seats)

I believe I have identified the hidden car. Is this correct?
