# Supplementary material
Source: ML conference proceedings conference paper supplement (https://openreview.net/forum?id=1qLZsyJN2t)
Supplement: supplementary_material [file Claude3.5Haiku_25Places.pdf › Optimal-Question-Asking-main/Claude3.5Haiku_25Places.pdf]

I'll help you solve this guessing game. I'll start by understanding the dataset and then systematically narrow down the possibilities by asking binary questions about the hidden place's attributes.

Initial belief distribution:

I have 23 total unique places in the dataset. Since I don't know which place is hidden, each place currently has an equal probability of being the correct answer (approximately  $1/23$  or 4.35%).

My first question will aim to eliminate as many places as possible. I'll ask about a somewhat distinctive attribute.

Is the hidden place a capital city?

    [Retry](#)

**SD** No.

Updated belief distribution:

I'll eliminate all capital cities, which removes:

- Rome
- Lima
- Tokyo
- Buenos Aires
- Bogota
- Lisbon
- Baghdad

Remaining places: 16 potential candidates (down from 23)

These eliminated places represent about 30.4% of the original dataset. Each remaining place now has a higher probability of being the hidden place (approximately 6.25%).

My next question will target another distinctive attribute to further narrow down the possibilities.

Is the hidden place an island?

**SD** No.

Updated belief distribution:

I'll now eliminate all islands, which removes:

- Mount Fuji
- Mumbai
- Bora Bora
- Hong Kong

Remaining places: 12 potential candidates

These additional eliminations represent about 17.4% of the original dataset. Each remaining place now has an approximately 8.33% chance of being the hidden place.

My next question will help me further distinguish between the remaining possibilities:

Is the hidden place a city?

**SD** No.

Updated belief distribution:

Now I'll eliminate all cities, which removes:

- Mumbai
- Rome
- Istanbul
- Cusco
- Lima
- Tokyo
- Buenos Aires
- Bogota
- Marrakech
- Los Angeles
- Lisbon
- Hong Kong
- Baghdad

Remaining places: 9 potential candidates:

1. Mount Fuji
2. Great Barrier Reef

3. Amazon Rainforest
4. The Great Wall of China
5. Mount Kilimanjaro
6. Victoria Falls
7. Cinque Terre
8. Grand Canyon
9. Salar de Uyuni

Each remaining place now has approximately an 11.11% chance of being the hidden place.

My next question will help me further narrow down the possibilities:

Is the hidden place mountainous?

**SD** Yes.

Updated belief distribution:

I'll eliminate non-mountainous places, which removes:

- Great Barrier Reef
- Amazon Rainforest
- Istanbul
- Victoria Falls
- Grand Canyon

Remaining places: 4 potential candidates:

1. Mount Fuji
2. The Great Wall of China
3. Mount Kilimanjaro
4. Cinque Terre
5. Salar de Uyuni (though this is slightly unusual given the previous answer)

Each remaining place now has approximately a 25% chance of being the hidden place.

My next question will help me further distinguish between these remaining possibilities:

Is the hidden place a tourist hotspot?

SD Yes.

Updated belief distribution:

Now I'll eliminate non-tourist hotspots, which removes:

- Salar de Uyuni

Remaining places: 4 potential candidates:

1. Mount Fuji
2. The Great Wall of China
3. Mount Kilimanjaro
4. Cinque Terre

Each remaining place now has approximately a 25% chance of being the hidden place.

My next question will help me further distinguish between these remaining possibilities:

Is the hidden place a natural site?

SD Yes.

Updated belief distribution:

I'll eliminate non-natural sites, which removes:

- The Great Wall of China
- Cinque Terre

Remaining places: 2 potential candidates:

1. Mount Fuji
2. Mount Kilimanjaro

Each remaining place now has a 50% chance of being the hidden place.

I'll ask a question to definitively identify the place:

Is the hidden place located in Africa?

SD You cannot ask questions outside of the binary attributes set.

You're right. I apologize for my previous question. I'll rephrase to use the existing binary attributes.

Is the hidden place cold?

**SD** Yes.

Updated belief distribution:

With "cold" as True, I'm left with only one place:

1. Mount Kilimanjaro

My confidence is now 100% that Mount Kilimanjaro is the hidden place.

Would you like me to confirm the full set of attributes that led me to this conclusion?
