# Supplementary material
Source: ML conference proceedings conference paper supplement (https://openreview.net/forum?id=1qLZsyJN2t)
Supplement: supplementary_material [file Claude3.7_100Synthetic.pdf › Optimal-Question-Asking-main/Claude3.7_100Synthetic.pdf]

I see you've shared a dataset that represents different objects (identified by hexadecimal codes like "20", "29", etc.) and their binary attributes (a through k). This appears to be for a guessing game where I need to ask binary questions about the attributes of a hidden object you have in mind, and then update my belief distribution about what the object might be.

Let me start by analyzing the dataset to understand the distribution of attributes:

 Analyzed data

View analysis 

Let me try again with a slightly different approach:

 Analyzed data

View analysis 

I'll try a different approach to get a better understanding of the full dataset:

 Analyzed data

View analysis 

Let me try one more approach to get a better understanding of the entire dataset:

 Analyzed data

View analysis 

Based on my analysis of the dataset, I'm ready to start the guessing game. I understand that you have a hidden object in mind from this dataset, and I need to ask binary questions about its attributes to determine what it is.

From the sample of the dataset I analyzed, I can see that:

1. Each object has 11 binary attributes (a through k)
2. Attribute 'h' appears to be closest to a 50/50 split in our sample (around 46.67%), making it a good first question to narrow down possibilities

So I'll start by asking about attribute 'h'.

Is attribute 'h' true for your hidden object?

    Retry 

**SD** No.

Thank you for answering. Attribute 'h' is false for the hidden object.

Current belief distribution:

- All objects where attribute 'h' is false are possible candidates.
- All objects where attribute 'h' is true are eliminated.

Let me ask about another attribute that will help narrow down the possibilities further.

Is attribute 'd' true for your hidden object?

SD Yes.

Thank you for the information. Attribute 'd' is true for the hidden object.

Current belief distribution:

- All objects where attribute 'h' is false AND attribute 'd' is true are possible candidates.
- All other objects are eliminated.

Now let me ask about another attribute to narrow it down further.

Is attribute 'e' true for your hidden object?

SD Yes.

Thank you for the information. Attribute 'e' is true for the hidden object.

Current belief distribution:

- All objects where attribute 'h' is false AND attribute 'd' is true AND attribute 'e' is true are possible candidates.
- All other objects are eliminated.

Let's continue narrowing down.

Is attribute 'f' true for your hidden object?

SD No.

Thank you for the information. Attribute 'f' is false for the hidden object.

Current belief distribution:

- All objects where:
  - 'h' is false AND

- 'd' is true AND
  - 'e' is true AND
  - 'f' is false are possible candidates.
- All other objects are eliminated.

Let's continue narrowing down.

Is attribute 'c' true for your hidden object?

**SD** Yes.

Thank you for the information. Attribute 'c' is true for the hidden object.

Current belief distribution:

- All objects where:
  - 'h' is false AND
  - 'd' is true AND
  - 'e' is true AND
  - 'f' is false AND
  - 'c' is true are possible candidates.
- All other objects are eliminated.

Let's continue to narrow down the possibilities.

Is attribute 'g' true for your hidden object?

**SD** No.

Thank you for the information. Attribute 'g' is false for the hidden object.

Current belief distribution:

- All objects where:
  - 'h' is false AND
  - 'd' is true AND
  - 'e' is true AND
  - 'f' is false AND

- 'c' is true AND
- 'g' is false are possible candidates.
- All other objects are eliminated.

Let's continue narrowing down.

Is attribute 'i' true for your hidden object?

**SD** Yes.

Thank you for the information. Attribute 'i' is true for the hidden object.

Current belief distribution:

- All objects where:
  - 'h' is false AND
  - 'd' is true AND
  - 'e' is true AND
  - 'f' is false AND
  - 'c' is true AND
  - 'g' is false AND
  - 'i' is true are possible candidates.
- All other objects are eliminated.

Let's continue narrowing down.

Is attribute 'j' true for your hidden object?

**SD** No.

Thank you for the information. Attribute 'j' is false for the hidden object.

Current belief distribution:

- All objects where:
  - 'h' is false AND
  - 'd' is true AND
  - 'e' is true AND

- 'f' is false AND
- 'c' is true AND
- 'g' is false AND
- 'i' is true AND
- 'j' is false are possible candidates.
- All other objects are eliminated.

Let's continue with the next attribute.

Is attribute 'k' true for your hidden object?

**SD** Yes.

Thank you for the information. Attribute 'k' is true for the hidden object.

Current belief distribution:

- All objects where:
  - 'h' is false AND
  - 'd' is true AND
  - 'e' is true AND
  - 'f' is false AND
  - 'c' is true AND
  - 'g' is false AND
  - 'i' is true AND
  - 'j' is false AND
  - 'k' is true are possible candidates.
- All other objects are eliminated.

Let's ask about the remaining attributes to complete the picture.

Is attribute 'a' true for your hidden object?

**SD** Yes.

Thank you for the information. Attribute 'a' is true for the hidden object.

Current belief distribution:

- All objects where:
  - 'a' is true AND
  - 'h' is false AND
  - 'd' is true AND
  - 'e' is true AND
  - 'f' is false AND
  - 'c' is true AND
  - 'g' is false AND
  - 'i' is true AND
  - 'j' is false AND
  - 'k' is true are possible candidates.
- All other objects are eliminated.

Finally, let me ask about the last attribute.

Is attribute 'b' true for your hidden object?

**SD** Yes.

Thank you for the information. Attribute 'b' is true for the hidden object.

Final belief distribution:

- The hidden object has the following attributes:
  - 'a' is true
  - 'b' is true
  - 'c' is true
  - 'd' is true
  - 'e' is true
  - 'f' is false
  - 'g' is false
  - 'h' is false
  - 'i' is true

- 'j' is false
- 'k' is true

Based on the dataset, this uniquely identifies the object with ID "7c5", which has this exact combination of attributes. This is my final answer - the hidden object is "7c5".
