# Supplementary material
Source: ML conference proceedings conference paper supplement (https://openreview.net/forum?id=1qLZsyJN2t)
Supplement: supplementary_material [file Claude3.7Sonnet_100Cars.pdf › Optimal-Question-Asking-main/Claude3.7Sonnet_100Cars.pdf]

Prompt: This is a cars attributes dataset. I have a hidden car in mind. You are allowed to ask me binary questions about the hidden car's attributes, for you to figure out the hidden car. After receiving an answer, at each step, you must print what **PASTED** belief distribution is and the calcu

SD

I see you've shared a dataset containing information about various car models and their attributes. The dataset is structured as a dictionary where each car model has binary (True/False) values for 20 different attributes such as body type, fuel type, luxury status, drive type, seating capacity, and more.

From the prompt, I understand we're playing a game where:

1. You have a hidden car in mind from this dataset
2. I need to guess which car it is by asking binary (yes/no) questions about its attributes
3. After each answer, I should share my current belief distribution and the calculated entropy drop
4. We continue until there are no more distinguishing attributes between the remaining options

I'll start by calculating the initial entropy of the system, which represents my uncertainty about which car you're thinking of. Then I'll ask questions to systematically reduce this uncertainty.

Let me know when you're ready for my first question!

    Retry 

SD Yes. I'm ready for your first question.

I'll start asking questions about your hidden car's attributes and track the probability distribution after each answer.

First, let me establish that we have 100 cars in the dataset, so initially each car has a  $1/100 = 0.01$  probability (1% chance) of being the hidden car. The initial entropy is:

$$H_0 = -\sum(p * \log_2(p)) = -100 * (0.01 * \log_2(0.01)) = -100 * (0.01 * -6.64) = 6.64 \text{ bits}$$

Now for my first question:

Is the hidden car an SUV?

SD No.

Thank you for your answer! Let me update my belief distribution.

Since you've confirmed the hidden car is NOT an SUV, I can eliminate all cars with the 'suv' attribute set to True.

From checking the dataset, 38 cars are SUVs (have 'suv': True), and 62 cars are not SUVs. So now I have 62 cars with equal probability of  $1/62 \approx 0.016$  each.

Current entropy:  $H_1 = -\sum(p * \log_2(p)) = -62 * (0.016 * \log_2(0.016)) \approx 5.95$  bits

Entropy drop:  $\Delta H = H_0 - H_1 = 6.64 - 5.95 = 0.69$  bits

For my next question:

Is the hidden car a sedan?

**SD** Yes.

Thank you for your answer! I'm updating my belief distribution.

The hidden car is a sedan and not an SUV. Out of the 62 non-SUV cars, 24 are sedans. So now my distribution has 24 possible cars, each with probability  $1/24 \approx 0.042$ .

Current entropy:  $H_2 = -\sum(p * \log_2(p)) = -24 * (0.042 * \log_2(0.042)) \approx 4.58$  bits

Entropy drop:  $\Delta H = H_1 - H_2 = 5.95 - 4.58 = 1.37$  bits

For my next question:

Is the hidden car electric?

**SD** Yes.

Thank you for your answer! I'm updating my belief distribution.

The hidden car is a sedan, not an SUV, and it's electric. Out of the 24 sedans, only 5 are electric vehicles: Tesla Model S, Chevrolet Bolt, Nissan Leaf, Tesla Model 3, and Hyundai Ioniq 6. So now my distribution has 5 possible cars, each with probability  $1/5 = 0.2$ .

Current entropy:  $H_3 = -\sum(p * \log_2(p)) = -5 * (0.2 * \log_2(0.2)) \approx 2.32$  bits

Entropy drop:  $\Delta H = H_2 - H_3 = 4.58 - 2.32 = 2.26$  bits

For my next question:

Is the hidden car considered a luxury vehicle?

SD Yes.

Thank you for your answer! I'm updating my belief distribution.

The hidden car is a sedan, not an SUV, it's electric, and it's a luxury vehicle. Out of the 5 electric sedans, only 3 are considered luxury vehicles: Tesla Model S, Tesla Model 3, and Hyundai Ioniq 6. So now my distribution has 3 possible cars, each with probability  $1/3 \approx 0.333$ .

Current entropy:  $H_4 = -\sum(p * \log_2(p)) = -3 * (0.333 * \log_2(0.333)) \approx 1.58$  bits

Entropy drop:  $\Delta H = H_3 - H_4 = 2.32 - 1.58 = 0.74$  bits

For my next question:

Does the hidden car have all-wheel drive?

SD Yes.

Thank you for your answer! I'm updating my belief distribution.

The hidden car is a sedan, not an SUV, it's electric, it's a luxury vehicle, and it has all-wheel drive. Out of the 3 remaining cars, only 2 have all-wheel drive: Tesla Model S and Tesla Model 3. So now my distribution has 2 possible cars, each with probability  $1/2 = 0.5$ .

Current entropy:  $H_5 = -\sum(p * \log_2(p)) = -2 * (0.5 * \log_2(0.5)) = 1$  bit

Entropy drop:  $\Delta H = H_4 - H_5 = 1.58 - 1 = 0.58$  bits

For my next question:

Is the hidden car expensive?

SD No.

Thank you for your answer! I'm updating my belief distribution.

The hidden car is a sedan, not an SUV, it's electric, it's a luxury vehicle, it has all-wheel drive, and it's not expensive. Of the 2 remaining cars, only Tesla Model 3 is not marked as expensive. So now my distribution has 1 possible car with probability 1.

Current entropy:  $H_6 = -\sum(p * \log_2(p)) = -1 * (1 * \log_2(1)) = 0$  bits

Entropy drop:  $\Delta H = H_5 - H_6 = 1 - 0 = 1$  bit

I believe the hidden car is:

**Tesla Model 3**

Since there are no more distinguishing attributes between the remaining options (as there's only one option left), we can conclude that the Tesla Model 3 is the hidden car. The Tesla Model 3 is a non-expensive, luxury, all-wheel drive, electric sedan.
