# Supplementary material
Source: ML conference proceedings conference paper supplement (https://openreview.net/forum?id=1qLZsyJN2t)
Supplement: supplementary_material [file Gemini2.0Flash_25Animals.pdf › Optimal-Question-Asking-main/Gemini2.0Flash_25Animals.pdf]

Alright, this sounds like a fun game! I'm ready.

My first question is: **Is the hidden animal a mammal?**

I'm excited to see what your answer reveals!

Yes.

Okay, knowing that the animal is a mammal significantly narrows things down!

Here is my current belief distribution:

- **Likely:** cat, dog, lion, elephant, whale, kangaroo, bat, giraffe, hippopotamus, rhino, tiger, bear, panda, cow, goat, horse, monkey
- **Impossible:** shark, eagle, penguin, crocodile, frog, snake, chicken, cuttlefish

My next question is: **Is the animal big?**

Yes.

Alright, we're making good progress! Knowing the animal is big helps even more.

Here is my updated belief distribution:

- **Likely:** lion, elephant, whale, kangaroo, giraffe, hippopotamus, rhino, tiger, bear, panda, cow, horse
- **Impossible:** cat, dog, bat, monkey, shark, eagle, penguin, crocodile, frog, snake, chicken, cuttlefish

My next question is: **Does the animal have fur?**

Yes.

Excellent! We're getting closer. The fact that it has fur is quite informative for the remaining possibilities.

Here's the belief distribution now:

- **Likely:** lion, kangaroo, giraffe, tiger, bear, panda, cow, horse
- **Impossible:** elephant, whale, hippopotamus, rhino, cat, dog, bat, monkey, shark, eagle, penguin, crocodile, frog, snake, chicken, cuttlefish

My next question is: **Is the animal a carnivore?**

Yes.

Okay, a big, furry carnivore! This is really starting to narrow it down.

Here's the updated belief distribution:

- **Likely:** lion, tiger, bear
- **Impossible:** kangaroo, giraffe, panda, cow, horse, elephant, whale, hippopotamus, rhino, cat, dog, bat, monkey, shark, eagle, penguin, crocodile, frog, snake, chicken, cuttlefish

My next question is: **Is the animal typically found in a jungle or a similar wild habitat?**

You cannot ask questions outside of the binary attributes set.

Ah, you are absolutely right! My apologies. I got a little carried away with trying to guess. Let me rephrase my question using only the provided attributes.

My next question is: **Can the animal swim?**

Yes.

Okay, so our big, furry, carnivorous animal can also swim. Let's see how that changes things!

Here is the updated belief distribution:

- **Likely:** tiger, bear
- **Impossible:** lion, kangaroo, giraffe, panda, cow, horse, elephant, whale, hippopotamus, rhino, cat, dog, bat, monkey, shark, eagle, penguin, crocodile, frog, snake, chicken, cuttlefish

We are down to just two possibilities! To distinguish between them, I will ask: **Is the animal domestic?**
