# Supplementary material
Source: ML conference proceedings conference paper supplement (https://openreview.net/forum?id=1qLZsyJN2t)
Supplement: supplementary_material [file Gemini2.0Flash_25Cars.pdf › Optimal-Question-Asking-main/Gemini2.0Flash_25Cars.pdf]

Alright, this sounds like a fun game! I'm ready to play.

My first question is: **Is the hidden car an SUV?**

After you answer, I will tell you my updated belief about which car you're thinking of. Let the guessing begin!

No.

Okay, the hidden car is not an SUV. Let's see which cars that eliminates.

Here's my updated belief distribution:

- **Ford Maverick:** 1/23
- **Mini Cooper:** 1/23
- **BMW 3 Series:** 1/23
- **Jaguar F-Type:** 1/23
- **Dodge Charger:** 1/23
- **Acura NSX:** 1/23
- **Lexus LC 500:** 1/23
- **Audi R8:** 1/23
- **Chevrolet Corvette:** 1/23
- **Toyota Prius:** 1/23
- **Rivian R1T:** 1/23
- **McLaren Artura:** 1/23

My next question is: **Is the hidden car a truck?**

No.

Alright, no SUVs and no trucks. That narrows it down further!

Here's my updated belief distribution:

- **Mini Cooper:** 1/11
- **BMW 3 Series:** 1/11
- **Jaguar F-Type:** 1/11
- **Dodge Charger:** 1/11
- **Acura NSX:** 1/11
- **Lexus LC 500:** 1/11
- **Audi R8:** 1/11
- **Chevrolet Corvette:** 1/11
- **Toyota Prius:** 1/11
- **McLaren Artura:** 1/11

My next question is: **Is the hidden car a coupe?**

Yes.

Okay, so the hidden car is a coupe. That helps a lot!

Here's my updated belief distribution:

- **Mini Cooper:** 1/4
- **Jaguar F-Type:** 1/4
- **Acura NSX:** 1/4
- **Lexus LC 500:** 1/4
- **Audi R8:** 1/4
- **Chevrolet Corvette:** 1/4
- **McLaren Artura:** 1/4

My next question is: **Is the hidden car a convertible?**

No.

Got it, no convertibles either. We're getting closer!

Here's the updated belief distribution:

- **Mini Cooper:** 1/5
- **Jaguar F-Type:** 1/5
- **Acura NSX:** 1/5
- **Chevrolet Corvette:** 1/5
- **McLaren Artura:** 1/5

My next question is: **Is the hidden car a sports car?**

No.

Alright, not a sports car. Let's see who's left.

Here's the updated belief distribution:

- **Mini Cooper:** 1/1

Based on your answers, the only car left that fits the criteria (not an SUV, not a truck, is a coupe, not a convertible, and not a sports car) is the **Mini Cooper**.

Am I right?
