# Supplementary material
Source: ML conference proceedings conference paper supplement (https://openreview.net/forum?id=1qLZsyJN2t)
Supplement: supplementary_material [file Gemini2.0Flash_25Places.pdf › Optimal-Question-Asking-main/Gemini2.0Flash_25Places.pdf]

Alright, this sounds like a fun game! I'm ready to play.

My first question is: **Is the hidden place a city?**

No.

Okay, so we can eliminate all the cities from the possibilities. Here's the updated belief distribution:

- Mount Fuji: 1/13
- Great Barrier Reef: 1/13
- Amazon Rainforest: 1/13
- The Great Wall of China: 1/13
- Mount Kilimanjaro: 1/13
- Victoria Falls: 1/13
- Cinque Terre: 1/13
- Grand Canyon: 1/13
- Bora Bora: 1/13
- Salar de Uyuni: 1/13
- Namib Desert: 1/13
- Plitvice Lakes: 1/13

My next question is: **Is the hidden place a natural site?**

Yes.

Great! That narrows things down further. Here's the updated belief distribution:

- Mount Fuji: 1/8
- Great Barrier Reef: 1/8

- Amazon Rainforest: 1/8
- Mount Kilimanjaro: 1/8
- Victoria Falls: 1/8
- Grand Canyon: 1/8
- Bora Bora: 1/8
- Salar de Uyuni: 1/8
- Namib Desert: 1/8
- Plitvice Lakes: 1/8

My next question is: **Is the hidden place located in a tropical region?**

Yes.

Alright, that helps a lot! Let's see the updated possibilities:

- Great Barrier Reef: 1/4
- Amazon Rainforest: 1/4
- Mount Kilimanjaro: 1/4
- Victoria Falls: 1/4
- Bora Bora: 1/4

My next question is: **Is the hidden place an island?**

No.

Okay, that eliminates another possibility. Here's the updated belief distribution:

- Great Barrier Reef: 1/3
- Amazon Rainforest: 1/3

- Mount Kilimanjaro: 1/3
- Victoria Falls: 1/3

My next question is: **Is the hidden place known for being mountainous?**

Yes.

Interesting! That leaves us with:

- Mount Kilimanjaro: 1/2
- Victoria Falls: 1/2

My next question is: **Is the hidden place also considered a cold environment?**

Yes.

Okay, that points to one specific location!

- Mount Kilimanjaro: 1/1

Is your hidden place **Mount Kilimanjaro**?
