# Supplementary material
Source: ML conference proceedings conference paper supplement (https://openreview.net/forum?id=1qLZsyJN2t)
Supplement: supplementary_material [file Gemini2.5Pro_100Animals.pdf › Optimal-Question-Asking-main/Gemini2.5Pro_100Animals.pdf]

Okay, I understand the rules. I have the list of animals and their attributes. Let's begin!

### Initial Belief Distribution:

My current belief is that the hidden animal could be any of the 83 animals provided:

["cat", "dog", "lion", "elephant", "whale", "shark", "eagle", "penguin", "crocodile", "frog", "snake", "kangaroo", "bat", "chicken", "cuttlefish", "giraffe", "hippopotamus", "rhino", "tiger", "bear", "panda", "cow", "goat", "horse", "monkey", "gorilla", "zebra", "mouse", "otter", "hedgehog", "squirrel", "chimpanzee", "camel", "wolf", "fox", "raccoon", "sloth", "koala", "buffalo", "deer", "moose", "sparrow", "flamingo", "ostrich", "parrot", "pelican", "duck", "swan", "turkey", "hawk", "vulture", "lizard", "tortoise", "turtle", "komodo\_dragon", "chameleon", "salamander", "newt", "toad", "salmon", "tuna", "clownfish", "goldfish", "ant", "bee", "beetle", "mosquito", "grasshopper", "spider", "scorpion", "octopus", "squid", "jellyfish", "starfish", "sea\_urchin", "platypus", "echidna", "armadillo", "walrus", "seal", "porcupine", "donkey", "reindeer", "lemur", "dolphin", "hammerhead\_shark", "manta\_ray", "eel", "pufferfish", "butterfly", "moth", "cockroach", "dragonfly", "crab", "lobster", "peacock", "pigeon", "emu", "hamster", "guinea\_pig"]

My first question is:

**Is the animal a mammal?**

Yes.

Show thinking

Okay, the animal is a mammal. That narrows it down!

### Current Belief Distribution:

My belief is updated. The possible animals are now:

["cat", "dog", "lion", "elephant", "whale", "kangaroo", "bat", "giraffe", "hippopotamus", "rhino", "tiger", "bear", "panda", "cow", "goat", "horse", "monkey", "gorilla", "zebra", "mouse", "otter", "hedgehog", "squirrel", "chimpanzee", "camel", "wolf", "fox", "raccoon", "sloth", "koala", "buffalo", "deer", "moose", "platypus", "echidna", "armadillo", "walrus", "seal", "porcupine", "donkey", "reindeer", "lemur", "dolphin", "hamster", "guinea\_pig"] (45 animals remain)

My next question is:

**Can the animal swim?**

No.

Show thinking

Okay, the animal is a mammal and it cannot swim.

**Current Belief Distribution:**

My belief is updated. The possible animals are now the mammals that cannot swim:

["cat", "lion", "elephant", "bat", "giraffe", "rhino", "panda", "cow", "goat", "monkey", "gorilla", "zebra", "mouse", "hedgehog", "squirrel", "chimpanzee", "camel", "fox", "koala", "echidna", "lemur", "hamster", "guinea\_pig"] (23 animals remain)

My next question is:

**Is the animal a herbivore?**

Yes.

Show thinking

Okay, the animal is a mammal, cannot swim, and is a herbivore.

**Current Belief Distribution:**

My belief is updated. The possible animals are now:

["elephant", "giraffe", "rhino", "panda", "cow", "goat", "gorilla", "zebra", "camel", "koala", "guinea\_pig"] (11 animals remain)

My next question is:

**Is the animal big?**

No.

Show thinking

Okay, the animal is a mammal, cannot swim, is a herbivore, and is not big.

**Current Belief Distribution:**

My belief is updated. The possible animals are now:

["goat", "koala", "guinea\_pig"] (3 animals remain)

My next question is:

**Is the animal domestic?**

No.

Show thinking

Okay, the animal is not domestic.

**Current Belief Distribution:**

Based on your answers:

- Is a mammal? Yes
- Can swim? No
- Is a herbivore? Yes
- Is big? No
- Is domestic? No

Filtering the possibilities:

- Starting list: ["goat", "koala", "guinea\_pig"]
- Domestic is False: Only "koala" remains.

My belief is now concentrated on a single animal: **koala**.

Therefore, the hidden animal you were thinking of is the **koala**.
