# Supplementary material
Source: ML conference proceedings conference paper supplement (https://openreview.net/forum?id=1qLZsyJN2t)
Supplement: supplementary_material [file Gemini2.5Pro_100Cars.pdf › Optimal-Question-Asking-main/Gemini2.5Pro_100Cars.pdf]

**Prompt: This is a cars attributes dataset. I have a hidden car in mind. You are allowed to ask me binary questions about the hidden car's attributes, for you to figure out...**

Okay, I understand the rules. Let's start!

There are 80 possible cars in the dataset.

### **Initial State:**

- **Belief Distribution:** Uniform over all 80 cars. Each car has a probability of 1/80. ['Tesla Model S', 'Toyota Corolla', 'Ford F-150', 'BMW 3 Series', 'Jeep Wrangler', 'Honda Civic', 'Chevrolet Bolt', 'Subaru Outback', 'Mercedes-Benz S-Class', 'Porsche 911', 'Ferrari 488', 'Toyota Prius', 'Ford Mustang', 'Chevrolet Tahoe', 'Mini Cooper', 'Volkswagen Golf', 'Audi A4', 'Audi R8', 'Lamborghini Huracan', 'Toyota Camry', 'Nissan Altima', 'Nissan Leaf', 'Hyundai Sonata', 'Kia Soul', 'Kia Telluride', 'BMW X5', 'BMW i3', 'Lexus RX', 'Lexus LC 500', 'Volvo XC90', 'Acura MDX', 'Acura NSX', 'Volkswagen Tiguan', 'Mazda CX-5', 'Mazda MX-5 Miata', 'Dodge Charger', 'Dodge Challenger', 'Ram 1500', 'GMC Sierra', 'Cadillac Escalade', 'Cadillac CTS', 'Buick Enclave', 'Bugatti Veyron', 'Rolls-Royce Phantom', 'Bentley Continental GT', 'Aston Martin DB11', 'Infiniti Q50', 'Infiniti QX80', 'Mitsubishi Outlander', 'Mitsubishi Mirage', 'Range Rover', 'Land Rover Defender', 'Tesla Model 3', 'Tesla Model X', 'Tesla Model Y', 'Toyota RAV4', 'Toyota Highlander', 'Honda Accord', 'Honda CR-V', 'Honda Odyssey', 'Hyundai Kona Electric', 'Hyundai Elantra', 'Kia Seltos', 'Genesis G70', 'Genesis GV80', 'Audi Q5', 'Audi Q7', 'Porsche Cayenne', 'Porsche Boxster', 'Chevrolet Corvette', 'Chevrolet Camaro', 'Jeep Grand Cherokee', 'Jeep Gladiator', 'Ford Explorer', 'Ford Bronco', 'Rivian R1T', 'Rivian R1S', 'Lucid Air', 'Polestar 2', 'Polestar 3', 'GMC Hummer EV', 'Ford Maverick', 'Chevrolet Silverado EV', 'Hyundai Ioniq 5', 'Hyundai Ioniq 6', 'Kia EV6', 'Kia Carnival', 'Chrysler Pacifica Hybrid', 'Toyota Sienna', 'Subaru Forester Wilderness', 'Subaru BRZ', 'Nissan Z', 'Alfa Romeo Giulia', 'Alfa Romeo Stelvio', 'Jaguar F-Type', 'Jaguar I-Pace', 'Aston Martin Valkyrie', 'McLaren Artura', 'Lotus Emira', 'GMC Yukon AT4']
- **Current Entropy:**  $H_0 = \log_2(80) \approx 6.32$  bits.

To maximize the information gain (entropy drop), I'll ask about an attribute that splits the current possibilities as evenly as possible. Let's check the 'gas' attribute. There are 42 gas cars and 38 non-gas (electric or hybrid) cars. This is the closest split among primary attributes.

**My first question is:** Is the car gas-powered (gas attribute is True)?

Okay, the car is not gas-powered. This means it must be either electric or hybrid.

### Step 1:

- **Current Belief Distribution:** The possible cars are reduced to 39 possibilities (those where gas is False). The probability is now  $1/39$  for each of these cars.
  - Possible Cars (39): ['Tesla Model S', 'Ford F-150', 'Chevrolet Bolt', 'Mercedes-Benz S-Class', 'Toyota Prius', 'Lamborghini Huracan', 'Nissan Leaf', 'BMW X5', 'BMW i3', 'Lexus RX', 'Volvo XC90', 'Acura NSX', 'Mitsubishi Outlander', 'Toyota RAV4', 'Honda Accord', 'Honda CR-V', 'Hyundai Sonata', 'Hyundai Elantra', 'Jeep Grand Cherokee', 'Ford Explorer', 'Ford Maverick', 'Chrysler Pacifica Hybrid', 'Toyota Sienna', 'McLaren Artura', 'Tesla Model 3', 'Tesla Model X', 'Tesla Model Y', 'Hyundai Kona Electric', 'Rivian R1T', 'Rivian R1S', 'Lucid Air', 'Polestar 2', 'Polestar 3', 'GMC Hummer EV', 'Chevrolet Silverado EV', 'Hyundai Ioniq 5', 'Hyundai Ioniq 6', 'Kia EV6', 'Jaguar I-Pace']
- **Current Entropy:**  $H_1 = \log_2(39) \approx 5.285$  bits.
- **Entropy Drop:**  $H_0 - H_1 = \log_2(80) - \log_2(39) \approx 6.322 - 5.285 = 1.037$  bits.

Now, I need to ask another question to narrow down these 39 possibilities. The attribute 'electric' splits this set almost perfectly (19 electric vs. 20 hybrid).

**My next question is:** Is the car electric (electric attribute is True)?

Great! The hidden car is electric.

### Step 2:

- **Current Belief Distribution:** The possible cars are reduced to the 19 electric vehicles. The probability is now  $1/19$  for each of these cars.
  - Possible Cars (19): ['Tesla Model S', 'Chevrolet Bolt', 'Nissan Leaf', 'BMW i3', 'Tesla Model 3', 'Tesla Model X', 'Tesla Model Y', 'Hyundai Kona Electric', 'Rivian R1T', 'Rivian R1S', 'Lucid Air', 'Polestar 2', 'Polestar 3', 'GMC Hummer EV', 'Chevrolet Silverado EV', 'Hyundai Ioniq 5', 'Hyundai Ioniq 6', 'Kia EV6', 'Jaguar I-Pace']
- **Current Entropy:**  $H_2 = \log_2(19) \approx 4.248$  bits.
- **Entropy Drop:**  $H_1 - H_2 = \log_2(39) - \log_2(19) \approx 5.285 - 4.248 = 1.037$  bits.

Now, let's narrow down these 19 electric cars. The attributes domestic (10 True / 9 False) and expensive (9 True / 10 False) provide the best splits. I'll choose domestic.

**My next question is:** Is the car domestic (domestic attribute is True)?

Got it, the car is domestic.

### Step 3:

- **Current Belief Distribution:** The possible cars are reduced to 10 domestic, electric vehicles. The probability is now 1/10 for each of these cars.
  - Possible Cars (10): ['Tesla Model S', 'Chevrolet Bolt', 'Tesla Model 3', 'Tesla Model X', 'Tesla Model Y', 'Rivian R1T', 'Rivian R1S', 'Lucid Air', 'GMC Hummer EV', 'Chevrolet Silverado EV']
- **Current Entropy:**  $H_3 = \log_2(10) \approx 3.322$  bits.
- **Entropy Drop:**  $H_2 - H_3 = \log_2(19) - \log_2(10) \approx 4.248 - 3.322 = 0.926$  bits.

We have 10 possibilities left. Let's find the best question. Checking the attributes for these 10 cars, the 'sedan' attribute provides the best split (4 sedans vs. 6 non-sedans).

**My next question is:** Is the car a sedan (sedan attribute is True)?

Okay, the car is a sedan.

### Step 4:

- **Current Belief Distribution:** The possible cars are reduced to 4 domestic, electric sedans. The probability is now 1/4 for each of these cars.
  - Possible Cars (4): ['Tesla Model S', 'Chevrolet Bolt', 'Tesla Model 3', 'Lucid Air']
- **Current Entropy:**  $H_4 = \log_2(4) = 2$  bits.
- **Entropy Drop:**  $H_3 - H_4 = \log_2(10) - \log_2(4) \approx 3.322 - 2 = 1.322$  bits.

We have 4 possibilities left. Let's check the attributes for these cars. The attribute expensive splits this set perfectly (2 expensive vs. 2 not expensive).

**My next question is:** Is the car expensive (expensive attribute is True)?

Alright, the car is not expensive.

### Step 5:

- **Current Belief Distribution:** We are down to 2 possible cars, both domestic,

electric, non-expensive sedans. The probability is now 1/2 for each.

- Possible Cars (2): ['Chevrolet Bolt', 'Tesla Model 3']
- **Current Entropy:**  $H_5 = \log_2(2) = 1$  bit.
- **Entropy Drop:**  $H_4 - H_5 = \log_2(4) - \log_2(2) = 2 - 1 = 1$  bit.

We have 2 possibilities left. Let's find a final distinguishing feature.

Comparing 'Chevrolet Bolt' and 'Tesla Model 3':

- 'Chevrolet Bolt': luxury is False, all\_wheel\_drive is False, front\_wheel\_drive is True.
- 'Tesla Model 3': luxury is True, all\_wheel\_drive is True, front\_wheel\_drive is False.

Any of these attributes (luxury, all\_wheel\_drive, front\_wheel\_drive) will identify the car. Let's ask about luxury.

**My final question is:** Is the car luxury (luxury attribute is True)?

Okay, the car is luxury.

**Step 6:**

- **Current Belief Distribution:** Based on your answer, we filter the previous two options ('Chevrolet Bolt', 'Tesla Model 3') to keep only the one where luxury is True. This leaves only one car.
  - Possible Cars (1): ['Tesla Model 3']
- **Current Entropy:**  $H_6 = \log_2(1) = 0$  bits.
- **Entropy Drop:**  $H_5 - H_6 = \log_2(2) - \log_2(1) = 1 - 0 = 1$  bit.

Since the entropy is 0, there is only one car matching all the attributes you provided.

**Conclusion:** The hidden car you were thinking of is the **Tesla Model 3**.
