# Supplementary material
Source: ML conference proceedings conference paper supplement (https://openreview.net/forum?id=1qLZsyJN2t)
Supplement: supplementary_material [file Gemini2.5Pro_100Places.pdf › Optimal-Question-Asking-main/Gemini2.5Pro_100Places.pdf]

Okay, I understand the rules. I have the dataset of 100 places and their attributes. I will ask you binary questions to figure out the hidden place you have in mind. After each answer you provide, I will update my list of possible places (my belief distribution) and report the entropy drop achieved in that step.

Let's start!

There are initially 100 possible places.

My initial belief distribution is uniform:  $P(\text{place}) = 1/100$  for all 100 places.

The initial entropy is  $H_0 = \log_2(100) \approx 6.64$  bits.

To maximize the information gained, I'll try to ask a question that splits the possibilities as evenly as possible. Several attributes offer a good split ('natural\_site': 46/54, 'unesco': 54/46, 'mountainous': 46/54). Let's go with 'natural\_site'.

**Question 1:** Is the hidden place a **natural site**? (i.e., is the 'natural\_site' attribute True?)

Yes.

Show thinking

Okay, you answered **Yes** to "Is the hidden place a natural site?".

**Update:**

- **Current Belief Distribution:** My belief is now distributed uniformly over the **46** places that are natural sites:
  - Amazon Rainforest, Antelope Canyon, Banff National Park, Black Forest, Bora Bora, Bryce Canyon National Park, Canary Islands, Death Valley, Etosha National Park, Fiordland National Park, Galapagos Islands, Giant's Causeway, Grand Canyon, Great Barrier Reef, Great Ocean Road, Ha Long Bay, Hawaii Volcanoes National Park, Iguazu Falls, Jeju Island, Kruger National Park, Lake Baikal, Lake Titicaca, Mont Blanc, Mount Etna, Mount Everest, Mount Fuji, Mount Kilimanjaro, Mount Rainier National Park, Mount Sinai, Namib Desert, Niagara Falls, Pamukkale, Patagonia, Plitvice Lakes, Sahara Desert, Salar de

Uyuni, Seychelles, Svalbard, Table Mountain, The Dead Sea, Uluru, Victoria Falls, Yellowstone National Park, Yosemite National Park, Zhangjiajie, Zion National Park.

- **Entropy Calculation:**

- The previous entropy was  $H_0 = \log_2(100) \approx 6.64$  bits.
- The current entropy is  $H_1 = \log_2(46) \approx 5.52$  bits.
- The **Entropy Drop** for this step is  $\Delta H_1 = H_0 - H_1 \approx 6.64 - 5.52 = \mathbf{1.12 \text{ bits}}$ .

Now, let's narrow it down further. The attribute 'unesco' splits these 46 places into 25 (True) and 21 (False), which is a good split.

**Question 2:** Is the hidden place a **UNESCO World Heritage site**? (i.e., is the 'unesco' attribute True?)

Yes.

Show thinking

Got it. You answered **Yes** to "Is the hidden place a UNESCO World Heritage site?".

**Update:**

- **Current Belief Distribution:** My belief is now distributed uniformly over the **25** places that are both natural sites and UNESCO sites:
  - Banff National Park, Canary Islands, Fiordland National Park, Galapagos Islands, Giant's Causeway, Grand Canyon, Great Barrier Reef, Ha Long Bay, Hawaii Volcanoes National Park, Iguazu Falls, Jeju Island, Lake Baikal, Mount Etna, Mount Everest, Mount Fuji, Mount Kilimanjaro, Mount Sinai, Pamukkale, Seychelles, Table Mountain, Uluru, Victoria Falls, Yellowstone National Park, Yosemite National Park, Zhangjiajie.
- **Entropy Calculation:**
  - The previous entropy was  $H_1 = \log_2(46) \approx 5.52$  bits.
  - The current entropy is  $H_2 = \log_2(25) = 4.64$  bits.
  - The **Entropy Drop** for this step is  $\Delta H_2 = H_1 - H_2 \approx 5.52 - 4.64 = \mathbf{0.88 \text{ bits}}$ .

Let's refine the search again. Two attributes, 'coastal' and 'tropical', split these 25 places nicely into 11 and 14 possibilities. I'll choose 'coastal'.

**Question 3:** Is the hidden place **coastal**? (i.e., is the 'coastal' attribute True?)

No.

Show thinking

Understood. You answered **No** to "Is the hidden place coastal?".

**Update:**

- **Current Belief Distribution:** My belief is now distributed uniformly over the **14** places that are natural sites, UNESCO sites, and are not coastal:
  - Banff National Park, Grand Canyon, Iguazu Falls, Lake Baikal, Mount Everest, Mount Fuji, Mount Kilimanjaro, Mount Sinai, Pamukkale, Uluru, Victoria Falls, Yellowstone National Park, Yosemite National Park, Zhangjiajie.
- **Entropy Calculation:**
  - The previous entropy was  $H_2 = \log_2(25) \approx 4.64$  bits.
  - The current entropy is  $H_3 = \log_2(14) \approx 3.81$  bits.
  - The **Entropy Drop** for this step is  $\Delta H_3 = H_2 - H_3 \approx 4.64 - 3.81 = \mathbf{0.83 \text{ bits}}$ .

Let's keep going. The attribute 'cold' splits these 14 places most evenly (into 6 True and 8 False).

**Question 4:** Is the hidden place **cold**? (i.e., is the 'cold' attribute True?)

Yes.

Show thinking

Alright, you answered **Yes** to "Is the hidden place cold?".

**Update:**

- **Current Belief Distribution:** My belief is now distributed uniformly over the **6** places that match all criteria so far (Natural, UNESCO, Not Coastal, Cold):
  - Lake Baikal, Mount Everest, Mount Fuji, Mount Kilimanjaro, Victoria Falls, Yellowstone National Park.
- **Entropy Calculation:**
  - The previous entropy was  $H_3 = \log_2(14) \approx 3.81$  bits.
  - The current entropy is  $H_4 = \log_2(6) \approx 2.58$  bits.
  - The **Entropy Drop** for this step is  $\Delta H_4 = H_3 - H_4 \approx 3.81 - 2.58 = \mathbf{1.23 \text{ bits}}$ .

We're getting closer! To split these 6 remaining options, the 'tropical' attribute works best (dividing them into 2 True and 4 False).

**Question 5:** Is the hidden place **tropical**? (i.e., is the 'tropical' attribute True?)

Yes.

Show thinking

Okay, the answer is **Yes** to "Is the hidden place tropical?".

**Update:**

- **Current Belief Distribution:** Based on your answers, the hidden place must be one of the following **2** locations:
  - Mount Kilimanjaro
  - Victoria Falls
- **Entropy Calculation:**
  - The previous entropy was  $H_4 = \log_2(6) \approx 2.58$  bits.
  - The current entropy is  $H_5 = \log_2(2) = 1$  bit.
  - The **Entropy Drop** for this step is  $\Delta H_5 = H_4 - H_5 \approx 2.58 - 1 = \mathbf{1.58 \text{ bits}}$ .

We are down to the final two! Only one attribute differs between them in the dataset.

**Question 6:** Is the hidden place **mountainous**? (i.e., is the 'mountainous' attribute True?)

No.

Show thinking

Perfect! You answered **No** to "Is the hidden place mountainous?".

**Update:**

- **Current Belief Distribution:** There is only **1** place left that matches all the attributes based on your answers:
  - **Victoria Falls**
- **Entropy Calculation:**
  - The previous entropy was  $H_5 = \log_2(2) = 1$  bit.
  - The current entropy is  $H_6 = \log_2(1) = 0$  bits.
  - The **Entropy Drop** for this final step is  $\Delta H_6 = H_5 - H_6 = 1 - 0 = \mathbf{1 \text{ bit}}$ .

Since there is only one possibility remaining and the entropy is now 0, I have found the hidden place!

The hidden place you were thinking of is **Victoria Falls**.
