# Supplementary material
Source: ML conference proceedings conference paper supplement (https://openreview.net/forum?id=1qLZsyJN2t)
Supplement: supplementary_material [file Gemini2.5Pro_100Synthetic.pdf › Optimal-Question-Asking-main/Gemini2.5Pro_100Synthetic.pdf]

This is a synthetic attributes dataset. I have a hidden object in mind. You are allowed to ask me binary questions about the hidden object's attributes, so you c...

Show thinking

Okay, I'm ready to start!

My current belief distribution includes all 96 objects:

["20", "29", "33", "4b", "52", "61", "63", "69", "77", "9f", "b1", "c9", "cd", "dd", "e1", "f7", "fa", "10e", "140", "153", "155", "17a", "180", "1b0", "1bc", "1ca", "1cb", "1cf", "1d5", "1ec", "1f5", "1fd", "220", "225", "228", "24a", "25b", "261", "262", "263", "284", "28f", "29e", "2d1", "2eb", "300", "313", "33a", "35f", "37a", "37e", "381", "392", "394", "396", "3a2", "3cf", "3e6", "3e8", "40b", "418", "421", "442", "444", "489", "4a2", "4c1", "4de", "4e0", "4ee", "4f2", "4fc", "509", "50b", "519", "56f", "5a9", "5b7", "5d8", "5e1", "5fa", "625", "67d", "68a", "697", "69d", "6b0", "6be", "6bf", "6cf", "6ec", "707", "71a", "722", "769", "78f", "7a3", "7c4", "7c5", "7f0"]

Is attribute 'd' true?

Yes.

Show thinking

Okay, attribute 'd' is true.

My current belief distribution (57 objects remaining):

["9f", "b1", "c9", "cd", "dd", "e1", "f7", "fa", "180", "1b0", "1bc", "1ca", "1cb", "1cf", "1d5", "1ec", "1f5", "1fd", "284", "28f", "29e", "2d1", "2eb", "381", "392", "394", "396", "3a2", "3cf", "3e6", "3e8", "489", "4a2", "4c1", "4de", "4e0", "4ee", "4f2", "4fc", "5a9", "5b7", "5d8", "5e1", "5fa", "68a", "697", "69d", "6b0", "6be", "6bf", "6cf", "6ec", "78f", "7a3", "7c4", "7c5", "7f0"]

Is attribute 'c' true?

Yes.

Show thinking

Okay, attribute 'c' is true.

My current belief distribution (28 objects remaining):

["180", "1b0", "1bc", "1ca", "1cb", "1cf", "1d5", "1ec", "1f5", "1fd", "381", "392", "394", "396", "3a2", "3cf", "3e6", "3e8", "5a9", "5b7", "5d8", "5e1", "5fa", "78f", "7a3", "7c4", "7c5", "7f0"]

Is attribute 'f' true?

No.

Show thinking

Okay, attribute 'f' is false.

My current belief distribution (14 objects remaining):

["180", "1ca", "1cb", "1cf", "1d5", "381", "392", "394", "396", "3cf", "5d8", "78f", "7c4", "7c5"]

Is attribute 'g' true?

No.

Show thinking

Okay, attribute 'g' is false.

My current belief distribution (7 objects remaining):

["180", "1ca", "1cb", "381", "3cf", "7c4", "7c5"]

Is attribute 'b' true?

Yes.

Show thinking

Okay, attribute 'b' is true.

My current belief distribution (4 objects remaining):

["381", "3cf", "7c4", "7c5"]

Is attribute 'a' true?

Yes.

Show thinking

Okay, attribute 'a' is true.

My current belief distribution (2 objects remaining):

["7c4", "7c5"]

Is attribute 'k' true?

Yes.

Show thinking

Okay, attribute 'k' is true.

My current belief distribution (1 object remaining):

["7c5"]

The hidden object is "**7c5**".

We can stop now as there is only one option left and no more distinguishing attributes are needed.
