# Supplementary material
Source: ML conference proceedings conference paper supplement (https://openreview.net/forum?id=1qLZsyJN2t)
Supplement: supplementary_material [file GPT 4o_Binary Search Game.pdf › Optimal-Question-Asking-main/GPT 4o_Binary Search Game.pdf]

# Number Guessing Game

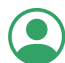

You are playing a guessing game.

- A secret integer is chosen uniformly at random between 1 and 1000 (inclusive).
- You may ask one yes/no question per turn, and it must be exactly in this form:  
Is the number  $\leq k$ ?  $\leftarrow$  replace  $k$  with any integer you choose.
- After you receive the answer, list the remaining possible integers before you ask the next question.
- When only one possibility is left, announce it with:  
The number is  $X$   
and stop.

You are not allowed to solve this using programming. Ask your first question now.

Is the number  $\leq 500$ ?

Remaining possibilities if YES: 1 to 500

Remaining possibilities if NO: 501 to 1000

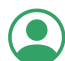

Yes.

Remaining possibilities: 1 to 500

Next question:

Is the number  $\leq 250$ ?

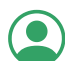

Yes.

Remaining possibilities: 1 to 250

Next question:

Is the number  $\leq 125$ ?

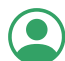

Yes.

Remaining possibilities: 1 to 125

Next question:

Is the number  $\leq 62$ ?

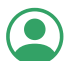

No.

Remaining possibilities: 63 to 125

Next question:

Is the number  $\leq 94$ ?

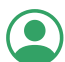

Yes.

Remaining possibilities: 63 to 94

Next question:

Is the number  $\leq 78$ ?

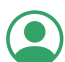

Yes.

Remaining possibilities: 63 to 78

Next question:

Is the number  $\leq 70$ ?

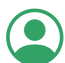

Yes.

Remaining possibilities: 63 to 70

Next question:

Is the number  $\leq 66$ ?

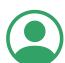

Yes.

Remaining possibilities: 63 to 66

Next question:

Is the number  $\leq 64$ ?

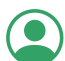

Yes.

Remaining possibilities: 63 to 64

Next question:

Is the number  $\leq 63$ ?

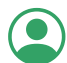

Yes.

The number is 63.
