# Supplementary material
Source: ML conference proceedings conference paper supplement (https://openreview.net/forum?id=1qLZsyJN2t)
Supplement: supplementary_material [file GPT o3_100 Animals.pdf › Optimal-Question-Asking-main/GPT o3_100 Animals.pdf]

# Animal Attributes Guessing Game

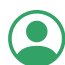

Prompt: This is an animal attributes dataset. I have a hidden animal in mind. You are allowed to ask me binary questions about the hidden animal's attributes, for you to figure out the hidden animal. After receiving an answer, at each step, you must print what your current belief distribution is, about the possible hidden animal. We can stop when there's no more distinguishing attributes between the leftover options. (You're not allowed to solve this using programming.)

```
animals = {
  "cat": {
    "mammal": True,
    "bird": False,
    "reptile": False,
    "amphibian": False,
    "fish": False,
    "insect": False,
    "big": False,
    "can_fly": False,
    "can_swim": False,
    "has_fur": True,
    "domestic": True,
    "carnivore": True,
    "herbivore": False,
    "lays_eggs": False
  },
  "dog": {
    "mammal": True,
    "bird": False,
    "reptile": False,
    "amphibian": False,
    "fish": False,
    "insect": False,
    "big": False,
    "can_fly": False,
    "can_swim": True,
    "has_fur": True,
    "domestic": True,
    "carnivore": True,
    "herbivore": False,
    "lays_eggs": False
  },
  "lion": {
    "mammal": True,
    "bird": False,
    "reptile": False,
```

```

    "amphibian": False,
    "fish": False,
    "insect": False,
    "big": True,
    "can_fly": False,
    "can_swim": False,
    "has_fur": True,
    "domestic": False,
    "carnivore": True,
    "herbivore": False,
    "lays_eggs": False
  },
  "elephant": {
    "mammal": True,
    "bird": False,
    "reptile": False,
    "amphibian": False,
    "fish": False,
    "insect": False,
    "big": True,
    "can_fly": False,
    "can_swim": False,
    "has_fur": False,
    "domestic": False,
    "carnivore": False,
    "herbivore": True,
    "lays_eggs": False
  },
  "whale": {
    "mammal": True,
    "bird": False,
    "reptile": False,
    "amphibian": False,
    "fish": False,
    "insect": False,
    "big": True,
    "can_fly": False,
    "can_swim": True,
    "has_fur": False,
    "domestic": False,
    "carnivore": True,
    "herbivore": False,
    "lays_eggs": False
  },
  "shark": {
    "mammal": False,
    "bird": False,
    "reptile": False,
    "amphibian": False,
    "fish": True,
    "insect": False,

```

```

    "big": True,
    "can_fly": False,
    "can_swim": True,
    "has_fur": False,
    "domestic": False,
    "carnivore": True,
    "herbivore": False,
    "lays_eggs": True
  },
  "eagle": {
    "mammal": False,
    "bird": True,
    "reptile": False,
    "amphibian": False,
    "fish": False,
    "insect": False,
    "big": False,
    "can_fly": True,
    "can_swim": False,
    "has_fur": False,
    "domestic": False,
    "carnivore": True,
    "herbivore": False,
    "lays_eggs": True
  },
  "penguin": {
    "mammal": False,
    "bird": True,
    "reptile": False,
    "amphibian": False,
    "fish": False,
    "insect": False,
    "big": False,
    "can_fly": False,
    "can_swim": True,
    "has_fur": False,
    "domestic": False,
    "carnivore": True,
    "herbivore": False,
    "lays_eggs": True
  },
  "crocodile": {
    "mammal": False,
    "bird": False,
    "reptile": True,
    "amphibian": False,
    "fish": False,
    "insect": False,
    "big": True,
    "can_fly": False,
    "can_swim": True,

```

```

    "has_fur": False,
    "domestic": False,
    "carnivore": True,
    "herbivore": False,
    "lays_eggs": True
  },
  "frog": {
    "mammal": False,
    "bird": False,
    "reptile": False,
    "amphibian": True,
    "fish": False,
    "insect": False,
    "big": False,
    "can_fly": False,
    "can_swim": True,
    "has_fur": False,
    "domestic": False,
    "carnivore": True,
    "herbivore": False,
    "lays_eggs": True
  },
  "snake": {
    "mammal": False,
    "bird": False,
    "reptile": True,
    "amphibian": False,
    "fish": False,
    "insect": False,
    "big": False,
    "can_fly": False,
    "can_swim": True,
    "has_fur": False,
    "domestic": False,
    "carnivore": True,
    "herbivore": False,
    "lays_eggs": True
  },
  "kangaroo": {
    "mammal": True,
    "bird": False,
    "reptile": False,
    "amphibian": False,
    "fish": False,
    "insect": False,
    "big": True,
    "can_fly": False,
    "can_swim": True,
    "has_fur": True,
    "domestic": False,
    "carnivore": False,

```

```

    "herbivore": True,
    "lays_eggs": False
  },
  "bat": {
    "mammal": True,
    "bird": False,
    "reptile": False,
    "amphibian": False,
    "fish": False,
    "insect": False,
    "big": False,
    "can_fly": True,
    "can_swim": False,
    "has_fur": True,
    "domestic": False,
    "carnivore": False,
    "herbivore": False,
    "lays_eggs": False
  },
  "chicken": {
    "mammal": False,
    "bird": True,
    "reptile": False,
    "amphibian": False,
    "fish": False,
    "insect": False,
    "big": False,
    "can_fly": False,
    "can_swim": False,
    "has_fur": False,
    "domestic": True,
    "carnivore": False,
    "herbivore": False,
    "lays_eggs": True
  },
  "cuttlefish": {
    "mammal": False,
    "bird": False,
    "reptile": False,
    "amphibian": False,
    "fish": False,
    "insect": False,
    "big": False,
    "can_fly": False,
    "can_swim": True,
    "has_fur": False,
    "domestic": False,
    "carnivore": True,
    "herbivore": False,
    "lays_eggs": True
  },

```

```

"giraffe": {
  "mammal": True,
  "bird": False,
  "reptile": False,
  "amphibian": False,
  "fish": False,
  "insect": False,
  "big": True,
  "can_fly": False,
  "can_swim": False,
  "has_fur": True,
  "domestic": False,
  "carnivore": False,
  "herbivore": True,
  "lays_eggs": False
},
"hippopotamus": {
  "mammal": True,
  "bird": False,
  "reptile": False,
  "amphibian": False,
  "fish": False,
  "insect": False,
  "big": True,
  "can_fly": False,
  "can_swim": True,
  "has_fur": False,
  "domestic": False,
  "carnivore": False,
  "herbivore": True,
  "lays_eggs": False
},
"rhino": {
  "mammal": True,
  "bird": False,
  "reptile": False,
  "amphibian": False,
  "fish": False,
  "insect": False,
  "big": True,
  "can_fly": False,
  "can_swim": False,
  "has_fur": False,
  "domestic": False,
  "carnivore": False,
  "herbivore": True,
  "lays_eggs": False
},
"tiger": {
  "mammal": True,

```

```

"bird": False,
"reptile": False,
"amphibian": False,
"fish": False,
"insect": False,
"big": True,
"can_fly": False,
"can_swim": True,
"has_fur": True,
"domestic": False,
"carnivore": True,
"herbivore": False,
"lays_eggs": False
},
"bear": {
  "mammal": True,
  "bird": False,
  "reptile": False,
  "amphibian": False,
  "fish": False,
  "insect": False,
  "big": True,
  "can_fly": False,
  "can_swim": True,
  "has_fur": True,
  "domestic": False,
  "carnivore": True,
  "herbivore": False,
  "lays_eggs": False
},
"panda": {
  "mammal": True,
  "bird": False,
  "reptile": False,
  "amphibian": False,
  "fish": False,
  "insect": False,
  "big": True,
  "can_fly": False,
  "can_swim": False,
  "has_fur": True,
  "domestic": False,
  "carnivore": False,
  "herbivore": True,
  "lays_eggs": False
},
"cow": {
  "mammal": True,
  "bird": False,
  "reptile": False,
  "amphibian": False,

```

```

"fish": False,
"insect": False,
"big": True,
"can_fly": False,
"can_swim": False,
"has_fur": True,
"domestic": True,
"carnivore": False,
"herbivore": True,
"lays_eggs": False
},
"goat": {
  "mammal": True,
  "bird": False,
  "reptile": False,
  "amphibian": False,
  "fish": False,
  "insect": False,
  "big": False,
  "can_fly": False,
  "can_swim": False,
  "has_fur": True,
  "domestic": True,
  "carnivore": False,
  "herbivore": True,
  "lays_eggs": False
},
"horse": {
  "mammal": True,
  "bird": False,
  "reptile": False,
  "amphibian": False,
  "fish": False,
  "insect": False,
  "big": True,
  "can_fly": False,
  "can_swim": True,
  "has_fur": True,
  "domestic": True,
  "carnivore": False,
  "herbivore": True,
  "lays_eggs": False
},
"monkey": {
  "mammal": True,
  "bird": False,
  "reptile": False,
  "amphibian": False,
  "fish": False,
  "insect": False,
  "big": False,

```



```

"can_fly": False,
"can_swim": False,
"has_fur": True,
"domestic": False,
"carnivore": False,
"herbivore": False,
"lays_eggs": False
},
"gorilla": {
  "mammal": True,
  "bird": False,
  "reptile": False,
  "amphibian": False,
  "fish": False,
  "insect": False,
  "big": True,
  "can_fly": False,
  "can_swim": False,
  "has_fur": True,
  "domestic": False,
  "carnivore": False,
  "herbivore": True,
  "lays_eggs": False
},
"zebra": {
  "mammal": True,
  "bird": False,
  "reptile": False,
  "amphibian": False,
  "fish": False,
  "insect": False,
  "big": True,
  "can_fly": False,
  "can_swim": False,
  "has_fur": True,
  "domestic": False,
  "carnivore": False,
  "herbivore": True,
  "lays_eggs": False
},
"mouse": {
  "mammal": True,
  "bird": False,
  "reptile": False,
  "amphibian": False,
  "fish": False,
  "insect": False,
  "big": False,
  "can_fly": False,
  "can_swim": False,
  "has_fur": True,

```

```

    "domestic": False,
    "carnivore": False,
    "herbivore": False,
    "lays_eggs": False
  },
  "otter": {
    "mammal": True,
    "bird": False,
    "reptile": False,
    "amphibian": False,
    "fish": False,
    "insect": False,
    "big": False,
    "can_fly": False,
    "can_swim": True,
    "has_fur": True,
    "domestic": False,
    "carnivore": True,
    "herbivore": False,
    "lays_eggs": False
  },
  "hedgehog": {
    "mammal": True,
    "bird": False,
    "reptile": False,
    "amphibian": False,
    "fish": False,
    "insect": False,
    "big": False,
    "can_fly": False,
    "can_swim": False,
    "has_fur": True,
    "domestic": False,
    "carnivore": True,
    "herbivore": False,
    "lays_eggs": False
  },
  "squirrel": {
    "mammal": True,
    "bird": False,
    "reptile": False,
    "amphibian": False,
    "fish": False,
    "insect": False,
    "big": False,
    "can_fly": False,
    "can_swim": False,
    "has_fur": True,
    "domestic": False,
    "carnivore": False,
    "herbivore": False,

```

```

    "lays_eggs": False
  },
  "chimpanzee": {
    "mammal": True,
    "bird": False,
    "reptile": False,
    "amphibian": False,
    "fish": False,
    "insect": False,
    "big": False,
    "can_fly": False,
    "can_swim": False,
    "has_fur": True,
    "domestic": False,
    "carnivore": False,
    "herbivore": False,
    "lays_eggs": False
  },
  "camel": {
    "mammal": True,
    "bird": False,
    "reptile": False,
    "amphibian": False,
    "fish": False,
    "insect": False,
    "big": True,
    "can_fly": False,
    "can_swim": False,
    "has_fur": True,
    "domestic": False,
    "carnivore": False,
    "herbivore": True,
    "lays_eggs": False
  },
  "wolf": {
    "mammal": True,
    "bird": False,
    "reptile": False,
    "amphibian": False,
    "fish": False,
    "insect": False,
    "big": False,
    "can_fly": False,
    "can_swim": True,
    "has_fur": True,
    "domestic": False,
    "carnivore": True,
    "herbivore": False,
    "lays_eggs": False
  },
  "fox": {

```

```

    "mammal": True,
    "bird": False,
    "reptile": False,
    "amphibian": False,
    "fish": False,
    "insect": False,
    "big": False,
    "can_fly": False,
    "can_swim": False,
    "has_fur": True,
    "domestic": False,
    "carnivore": True,
    "herbivore": False,
    "lays_eggs": False
  },
  "raccoon": {
    "mammal": True,
    "bird": False,
    "reptile": False,
    "amphibian": False,
    "fish": False,
    "insect": False,
    "big": False,
    "can_fly": False,
    "can_swim": True,
    "has_fur": True,
    "domestic": False,
    "carnivore": False,
    "herbivore": False,
    "lays_eggs": False
  },
  "sloth": {
    "mammal": True,
    "bird": False,
    "reptile": False,
    "amphibian": False,
    "fish": False,
    "insect": False,
    "big": False,
    "can_fly": False,
    "can_swim": True,
    "has_fur": True,
    "domestic": False,
    "carnivore": False,
    "herbivore": True,
    "lays_eggs": False
  },
  "koala": {
    "mammal": True,
    "bird": False,
    "reptile": False,

```

```

    "amphibian": False,
    "fish": False,
    "insect": False,
    "big": False,
    "can_fly": False,
    "can_swim": False,
    "has_fur": True,
    "domestic": False,
    "carnivore": False,
    "herbivore": True,
    "lays_eggs": False
  },
  "buffalo": {
    "mammal": True,
    "bird": False,
    "reptile": False,
    "amphibian": False,
    "fish": False,
    "insect": False,
    "big": True,
    "can_fly": False,
    "can_swim": True,
    "has_fur": False,
    "domestic": False,
    "carnivore": False,
    "herbivore": True,
    "lays_eggs": False
  },
  "deer": {
    "mammal": True,
    "bird": False,
    "reptile": False,
    "amphibian": False,
    "fish": False,
    "insect": False,
    "big": True,
    "can_fly": False,
    "can_swim": True,
    "has_fur": True,
    "domestic": False,
    "carnivore": False,
    "herbivore": True,
    "lays_eggs": False
  },
  "moose": {
    "mammal": True,
    "bird": False,
    "reptile": False,
    "amphibian": False,
    "fish": False,
    "insect": False,

```

```

    "big": True,
    "can_fly": False,
    "can_swim": True,
    "has_fur": True,
    "domestic": False,
    "carnivore": False,
    "herbivore": True,
    "lays_eggs": False
  },

  "sparrow": {
    "mammal": False,
    "bird": True,
    "reptile": False,
    "amphibian": False,
    "fish": False,
    "insect": False,
    "big": False,
    "can_fly": True,
    "can_swim": False,
    "has_fur": False,
    "domestic": False,
    "carnivore": False,
    "herbivore": False,
    "lays_eggs": True
  },

  "flamingo": {
    "mammal": False,
    "bird": True,
    "reptile": False,
    "amphibian": False,
    "fish": False,
    "insect": False,
    "big": True,
    "can_fly": True,
    "can_swim": False,
    "has_fur": False,
    "domestic": False,
    "carnivore": False,
    "herbivore": False,
    "lays_eggs": True
  },

  "ostrich": {
    "mammal": False,
    "bird": True,
    "reptile": False,
    "amphibian": False,
    "fish": False,
    "insect": False,
    "big": True,
    "can_fly": False,

```

```

"can_swim": False,
"has_fur": False,
"domestic": False,
"carnivore": False,
"herbivore": False,
"lays_eggs": True
},
"parrot": {
  "mammal": False,
  "bird": True,
  "reptile": False,
  "amphibian": False,
  "fish": False,
  "insect": False,
  "big": False,
  "can_fly": True,
  "can_swim": False,
  "has_fur": False,
  "domestic": False,
  "carnivore": False,
  "herbivore": False,
  "lays_eggs": True
},
"pelican": {
  "mammal": False,
  "bird": True,
  "reptile": False,
  "amphibian": False,
  "fish": False,
  "insect": False,
  "big": False,
  "can_fly": True,
  "can_swim": True,
  "has_fur": False,
  "domestic": False,
  "carnivore": True,
  "herbivore": False,
  "lays_eggs": True
},
"duck": {
  "mammal": False,
  "bird": True,
  "reptile": False,
  "amphibian": False,
  "fish": False,
  "insect": False,
  "big": False,
  "can_fly": True,
  "can_swim": True,
  "has_fur": False,
  "domestic": False,

```

```

    "carnivore": False,
    "herbivore": False,
    "lays_eggs": True
},
"swan": {
    "mammal": False,
    "bird": True,
    "reptile": False,
    "amphibian": False,
    "fish": False,
    "insect": False,
    "big": True,
    "can_fly": True,
    "can_swim": True,
    "has_fur": False,
    "domestic": False,
    "carnivore": False,
    "herbivore": False,
    "lays_eggs": True
},
"turkey": {
    "mammal": False,
    "bird": True,
    "reptile": False,
    "amphibian": False,
    "fish": False,
    "insect": False,
    "big": False,
    "can_fly": False,
    "can_swim": False,
    "has_fur": False,
    "domestic": False,
    "carnivore": False,
    "herbivore": False,
    "lays_eggs": True
},
"hawk": {
    "mammal": False,
    "bird": True,
    "reptile": False,
    "amphibian": False,
    "fish": False,
    "insect": False,
    "big": False,
    "can_fly": True,
    "can_swim": False,
    "has_fur": False,
    "domestic": False,
    "carnivore": True,
    "herbivore": False,
    "lays_eggs": True

```



```

},
"vulture": {
  "mammal": False,
  "bird": True,
  "reptile": False,
  "amphibian": False,
  "fish": False,
  "insect": False,
  "big": False,
  "can_fly": True,
  "can_swim": False,
  "has_fur": False,
  "domestic": False,
  "carnivore": True,
  "herbivore": False,
  "lays_eggs": True
},

```

```

"lizard": {
  "mammal": False,
  "bird": False,
  "reptile": True,
  "amphibian": False,
  "fish": False,
  "insect": False,
  "big": False,
  "can_fly": False,
  "can_swim": False,
  "has_fur": False,
  "domestic": False,
  "carnivore": True,
  "herbivore": False,
  "lays_eggs": True
},

```

```

"tortoise": {
  "mammal": False,
  "bird": False,
  "reptile": True,
  "amphibian": False,
  "fish": False,
  "insect": False,
  "big": False,
  "can_fly": False,
  "can_swim": False,
  "has_fur": False,
  "domestic": False,
  "carnivore": False,
  "herbivore": True,
  "lays_eggs": True
},

```

```

"turtle": {

```

```

"mammal": False,
"bird": False,
"reptile": True,
"amphibian": False,
"fish": False,
"insect": False,
"big": False,
"can_fly": False,
"can_swim": True,
"has_fur": False,
"domestic": False,
"carnivore": False,
"herbivore": False,
"lays_eggs": True
},
"komodo_dragon": {
  "mammal": False,
  "bird": False,
  "reptile": True,
  "amphibian": False,
  "fish": False,
  "insect": False,
  "big": True,
  "can_fly": False,
  "can_swim": True,
  "has_fur": False,
  "domestic": False,
  "carnivore": True,
  "herbivore": False,
  "lays_eggs": True
},
"chameleon": {
  "mammal": False,
  "bird": False,
  "reptile": True,
  "amphibian": False,
  "fish": False,
  "insect": False,
  "big": False,
  "can_fly": False,
  "can_swim": False,
  "has_fur": False,
  "domestic": False,
  "carnivore": True,
  "herbivore": False,
  "lays_eggs": True
},
"salamander": {
  "mammal": False,
  "bird": False,

```

```

"reptile": False,
"amphibian": True,
"fish": False,
"insect": False,
"big": False,
"can_fly": False,
"can_swim": True,
"has_fur": False,
"domestic": False,
"carnivore": True,
"herbivore": False,
"lays_eggs": True
},
"newt": {
  "mammal": False,
  "bird": False,
  "reptile": False,
  "amphibian": True,
  "fish": False,
  "insect": False,
  "big": False,
  "can_fly": False,
  "can_swim": True,
  "has_fur": False,
  "domestic": False,
  "carnivore": True,
  "herbivore": False,
  "lays_eggs": True
},
"toad": {
  "mammal": False,
  "bird": False,
  "reptile": False,
  "amphibian": True,
  "fish": False,
  "insect": False,
  "big": False,
  "can_fly": False,
  "can_swim": True,
  "has_fur": False,
  "domestic": False,
  "carnivore": True,
  "herbivore": False,
  "lays_eggs": True
},
"salmon": {
  "mammal": False,
  "bird": False,
  "reptile": False,
  "amphibian": False,

```

```

"fish": True,
"insect": False,
"big": False,
"can_fly": False,
"can_swim": True,
"has_fur": False,
"domestic": False,
"carnivore": True,
"herbivore": False,
"lays_eggs": True
},
"tuna": {
  "mammal": False,
  "bird": False,
  "reptile": False,
  "amphibian": False,
  "fish": True,
  "insect": False,
  "big": True,
  "can_fly": False,
  "can_swim": True,
  "has_fur": False,
  "domestic": False,
  "carnivore": True,
  "herbivore": False,
  "lays_eggs": True
},
"clownfish": {
  "mammal": False,
  "bird": False,
  "reptile": False,
  "amphibian": False,
  "fish": True,
  "insect": False,
  "big": False,
  "can_fly": False,
  "can_swim": True,
  "has_fur": False,
  "domestic": False,
  "carnivore": False,
  "herbivore": False,
  "lays_eggs": True
},
"goldfish": {
  "mammal": False,
  "bird": False,
  "reptile": False,
  "amphibian": False,
  "fish": True,
  "insect": False,
  "big": False,

```

```
"can_fly": False,
"can_swim": True,
"has_fur": False,
"domestic": True,
"carnivore": False,
"herbivore": False,
"lays_eggs": True
},
```

```
"ant": {
  "mammal": False,
  "bird": False,
  "reptile": False,
  "amphibian": False,
  "fish": False,
  "insect": True,
  "big": False,
  "can_fly": False,
  "can_swim": False,
  "has_fur": False,
  "domestic": False,
  "carnivore": False,
  "herbivore": False,
  "lays_eggs": True
},
```

```
"bee": {
  "mammal": False,
  "bird": False,
  "reptile": False,
  "amphibian": False,
  "fish": False,
  "insect": True,
  "big": False,
  "can_fly": True,
  "can_swim": False,
  "has_fur": False,
  "domestic": False,
  "carnivore": False,
  "herbivore": False,
  "lays_eggs": True
},
```

```
"beetle": {
  "mammal": False,
  "bird": False,
  "reptile": False,
  "amphibian": False,
  "fish": False,
  "insect": True,
  "big": False,
  "can_fly": True,
  "can_swim": False,
```

```

    "has_fur": False,
    "domestic": False,
    "carnivore": False,
    "herbivore": False,
    "lays_eggs": True
  },
  "mosquito": {
    "mammal": False,
    "bird": False,
    "reptile": False,
    "amphibian": False,
    "fish": False,
    "insect": True,
    "big": False,
    "can_fly": True,
    "can_swim": False,
    "has_fur": False,
    "domestic": False,
    "carnivore": True,
    "herbivore": False,
    "lays_eggs": True
  },
  "grasshopper": {
    "mammal": False,
    "bird": False,
    "reptile": False,
    "amphibian": False,
    "fish": False,
    "insect": True,
    "big": False,
    "can_fly": True,
    "can_swim": False,
    "has_fur": False,
    "domestic": False,
    "carnivore": False,
    "herbivore": True,
    "lays_eggs": True
  },
  "spider": {
    "mammal": False,
    "bird": False,
    "reptile": False,
    "amphibian": False,
    "fish": False,
    "insect": False,
    "big": False,
    "can_fly": False,
    "can_swim": False,
    "has_fur": False,
    "domestic": False,

```

```

    "carnivore": True,
    "herbivore": False,
    "lays_eggs": True
  },
  "scorpion": {
    "mammal": False,
    "bird": False,
    "reptile": False,
    "amphibian": False,
    "fish": False,
    "insect": False,
    "big": False,
    "can_fly": False,
    "can_swim": False,
    "has_fur": False,
    "domestic": False,
    "carnivore": True,
    "herbivore": False,
    "lays_eggs": False
  },
  "octopus": {
    "mammal": False,
    "bird": False,
    "reptile": False,
    "amphibian": False,
    "fish": False,
    "insect": False,
    "big": False,
    "can_fly": False,
    "can_swim": True,
    "has_fur": False,
    "domestic": False,
    "carnivore": True,
    "herbivore": False,
    "lays_eggs": True
  },
  "squid": {
    "mammal": False,
    "bird": False,
    "reptile": False,
    "amphibian": False,
    "fish": False,
    "insect": False,
    "big": False,
    "can_fly": False,
    "can_swim": True,
    "has_fur": False,
    "domestic": False,
    "carnivore": True,
    "herbivore": False,

```

```

    "lays_eggs": True
  },
  "jellyfish": {
    "mammal": False,
    "bird": False,
    "reptile": False,
    "amphibian": False,
    "fish": False,
    "insect": False,
    "big": False,
    "can_fly": False,
    "can_swim": True,
    "has_fur": False,
    "domestic": False,
    "carnivore": True,
    "herbivore": False,
    "lays_eggs": True
  },
  "starfish": {
    "mammal": False,
    "bird": False,
    "reptile": False,
    "amphibian": False,
    "fish": False,
    "insect": False,
    "big": False,
    "can_fly": False,
    "can_swim": False,
    "has_fur": False,
    "domestic": False,
    "carnivore": True,
    "herbivore": False,
    "lays_eggs": True
  },
  "sea_urchin": {
    "mammal": False,
    "bird": False,
    "reptile": False,
    "amphibian": False,
    "fish": False,
    "insect": False,
    "big": False,
    "can_fly": False,
    "can_swim": False,
    "has_fur": False,
    "domestic": False,
    "carnivore": False,
    "herbivore": False,
    "lays_eggs": True
  },

```



```

"platypus": {
  "mammal": True,
  "bird": False,
  "reptile": False,
  "amphibian": False,
  "fish": False,
  "insect": False,
  "big": False,
  "can_fly": False,
  "can_swim": True,
  "has_fur": True,
  "domestic": False,
  "carnivore": True,
  "herbivore": False,
  "lays_eggs": True
},
"echidna": {
  "mammal": True,
  "bird": False,
  "reptile": False,
  "amphibian": False,
  "fish": False,
  "insect": False,
  "big": False,
  "can_fly": False,
  "can_swim": False,
  "has_fur": True,
  "domestic": False,
  "carnivore": True,
  "herbivore": False,
  "lays_eggs": True
},
"armadillo": {
  "mammal": True,
  "bird": False,
  "reptile": False,
  "amphibian": False,
  "fish": False,
  "insect": False,
  "big": False,
  "can_fly": False,
  "can_swim": True,
  "has_fur": False,
  "domestic": False,
  "carnivore": True,
  "herbivore": False,
  "lays_eggs": False
},
"walrus": {
  "mammal": True,
  "bird": False,

```

```

"reptile": False,
"amphibian": False,
"fish": False,
"insect": False,
"big": True,
"can_fly": False,
"can_swim": True,
"has_fur": False,
"domestic": False,
"carnivore": True,
"herbivore": False,
"lays_eggs": False
},
"seal": {
  "mammal": True,
  "bird": False,
  "reptile": False,
  "amphibian": False,
  "fish": False,
  "insect": False,
  "big": False,
  "can_fly": False,
  "can_swim": True,
  "has_fur": False,
  "domestic": False,
  "carnivore": True,
  "herbivore": False,
  "lays_eggs": False
},
"porcupine": {
  "mammal": True,
  "bird": False,
  "reptile": False,
  "amphibian": False,
  "fish": False,
  "insect": False,
  "big": False,
  "can_fly": False,
  "can_swim": True,
  "has_fur": True,
  "domestic": False,
  "carnivore": False,
  "herbivore": True,
  "lays_eggs": False
},
"donkey": {
  "mammal": True,
  "bird": False,
  "reptile": False,
  "amphibian": False,
  "fish": False,

```

```

"insect": False,
"big": False,
"can_fly": False,
"can_swim": True,
"has_fur": True,
"domestic": True,
"carnivore": False,
"herbivore": True,
"lays_eggs": False
},
"reindeer": {
  "mammal": True,
  "bird": False,
  "reptile": False,
  "amphibian": False,
  "fish": False,
  "insect": False,
  "big": True,
  "can_fly": False,
  "can_swim": True,
  "has_fur": True,
  "domestic": True,
  "carnivore": False,
  "herbivore": True,
  "lays_eggs": False
},
"lemur": {
  "mammal": True,
  "bird": False,
  "reptile": False,
  "amphibian": False,
  "fish": False,
  "insect": False,
  "big": False,
  "can_fly": False,
  "can_swim": False,
  "has_fur": True,
  "domestic": False,
  "carnivore": False,
  "herbivore": False,
  "lays_eggs": False
},
"dolphin": {
  "mammal": True,
  "bird": False,
  "reptile": False,
  "amphibian": False,
  "fish": False,
  "insect": False,
  "big": False,
  "can_fly": False,

```

```

"can_swim": True,
"has_fur": False,
"domestic": False,
"carnivore": True,
"herbivore": False,
"lays_eggs": False
},
"hammerhead_shark": {
  "mammal": False,
  "bird": False,
  "reptile": False,
  "amphibian": False,
  "fish": True,
  "insect": False,
  "big": True,
  "can_fly": False,
  "can_swim": True,
  "has_fur": False,
  "domestic": False,
  "carnivore": True,
  "herbivore": False,
  "lays_eggs": True
},
"manta_ray": {
  "mammal": False,
  "bird": False,
  "reptile": False,
  "amphibian": False,
  "fish": True,
  "insect": False,
  "big": True,
  "can_fly": False,
  "can_swim": True,
  "has_fur": False,
  "domestic": False,
  "carnivore": True,
  "herbivore": False,
  "lays_eggs": True
},
"eel": {
  "mammal": False,
  "bird": False,
  "reptile": False,
  "amphibian": False,
  "fish": True,
  "insect": False,
  "big": False,
  "can_fly": False,
  "can_swim": True,
  "has_fur": False,
  "domestic": False,

```

```

    "carnivore": True,
    "herbivore": False,
    "lays_eggs": True
  },
  "pufferfish": {
    "mammal": False,
    "bird": False,
    "reptile": False,
    "amphibian": False,
    "fish": True,
    "insect": False,
    "big": False,
    "can_fly": False,
    "can_swim": True,
    "has_fur": False,
    "domestic": False,
    "carnivore": True,
    "herbivore": False,
    "lays_eggs": True
  },
  "butterfly": {
    "mammal": False,
    "bird": False,
    "reptile": False,
    "amphibian": False,
    "fish": False,
    "insect": True,
    "big": False,
    "can_fly": True,
    "can_swim": False,
    "has_fur": False,
    "domestic": False,
    "carnivore": False,
    "herbivore": False,
    "lays_eggs": True
  },
  "moth": {
    "mammal": False,
    "bird": False,
    "reptile": False,
    "amphibian": False,
    "fish": False,
    "insect": True,
    "big": False,
    "can_fly": True,
    "can_swim": False,
    "has_fur": False,
    "domestic": False,
    "carnivore": False,
    "herbivore": False,
    "lays_eggs": True
  }
}

```

```

},
"cockroach": {
  "mammal": False,
  "bird": False,
  "reptile": False,
  "amphibian": False,
  "fish": False,
  "insect": True,
  "big": False,
  "can_fly": True,
  "can_swim": False,
  "has_fur": False,
  "domestic": False,
  "carnivore": False,
  "herbivore": False,
  "lays_eggs": True
},
"dragonfly": {
  "mammal": False,
  "bird": False,
  "reptile": False,
  "amphibian": False,
  "fish": False,
  "insect": True,
  "big": False,
  "can_fly": True,
  "can_swim": False,
  "has_fur": False,
  "domestic": False,
  "carnivore": True,
  "herbivore": False,
  "lays_eggs": True
},
"crab": {
  "mammal": False,
  "bird": False,
  "reptile": False,
  "amphibian": False,
  "fish": False,
  "insect": False,
  "big": False,
  "can_fly": False,
  "can_swim": True,
  "has_fur": False,
  "domestic": False,
  "carnivore": True,
  "herbivore": False,
  "lays_eggs": True
},
"lobster": {
  "mammal": False,

```

```

"bird": False,
"reptile": False,
"amphibian": False,
"fish": False,
"insect": False,
"big": False,
"can_fly": False,
"can_swim": True,
"has_fur": False,
"domestic": False,
"carnivore": True,
"herbivore": False,
"lays_eggs": True
},
"peacock": {
  "mammal": False,
  "bird": True,
  "reptile": False,
  "amphibian": False,
  "fish": False,
  "insect": False,
  "big": False,
  "can_fly": True,
  "can_swim": False,
  "has_fur": False,
  "domestic": False,
  "carnivore": False,
  "herbivore": False,
  "lays_eggs": True
},
"pigeon": {
  "mammal": False,
  "bird": True,
  "reptile": False,
  "amphibian": False,
  "fish": False,
  "insect": False,
  "big": False,
  "can_fly": True,
  "can_swim": False,
  "has_fur": False,
  "domestic": False,
  "carnivore": False,
  "herbivore": False,
  "lays_eggs": True
},
"emu": {
  "mammal": False,
  "bird": True,
  "reptile": False,
  "amphibian": False,

```

```

"fish": False,
"insect": False,
"big": True,
"can_fly": False,
"can_swim": False,
"has_fur": False,
"domestic": False,
"carnivore": False,
"herbivore": False,
"lays_eggs": True
},
"hamster": {
  "mammal": True,
  "bird": False,
  "reptile": False,
  "amphibian": False,
  "fish": False,
  "insect": False,
  "big": False,
  "can_fly": False,
  "can_swim": False,
  "has_fur": True,
  "domestic": True,
  "carnivore": False,
  "herbivore": False,
  "lays_eggs": False
},
"guinea_pig": {
  "mammal": True,
  "bird": False,
  "reptile": False,
  "amphibian": False,
  "fish": False,
  "insect": False,
  "big": False,
  "can_fly": False,
  "can_swim": False,
  "has_fur": True,
  "domestic": True,
  "carnivore": False,
  "herbivore": True,
  "lays_eggs": False
}
}

```

Question 1: Is your animal a **mammal**?

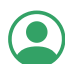



Yes.

Great, it's a mammal.

**Current belief distribution (45 possibilities, each  $\approx 1 / 45 \approx 2.22$  percent):**

cat, dog, lion, elephant, whale, kangaroo, bat, giraffe, hippopotamus, rhino, tiger, bear, panda, cow, goat, horse, monkey, gorilla, zebra, mouse, otter, hedgehog, squirrel, chimpanzee, camel, wolf, fox, raccoon, sloth, koala, buffalo, deer, moose, platypus, echidna, armadillo, walrus, seal, porcupine, donkey, reindeer, lemur, dolphin, hamster, guinea\_pig

**Question 2:** Is your animal **big** (as defined in the dataset)?

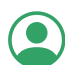

No.

We now have 25 candidates, each with roughly  $1 / 25 \approx 4$  percent probability:

armadillo, bat, cat, chimpanzee, dog, dolphin, donkey, echidna, fox, goat, guinea\_pig, hamster, hedgehog, koala, lemur, monkey, mouse, otter, platypus, porcupine, raccoon, seal, sloth, squirrel, wolf

**Question 3:** Is your animal classified as a **carnivore** in the dataset?

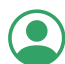

No.

We are down to 14 options, each about  $1 / 14 \approx 7.1$  percent likely:

bat, chimpanzee, donkey, goat, guinea\_pig, hamster, koala, lemur, monkey, mouse, porcupine, raccoon, sloth, squirrel

**Question 4:** Is your animal a **herbivore** in the dataset?

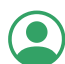

Yes.

We are left with 6 candidates, each about  $1 / 6 \approx 16.7$  percent likely:

donkey, goat, guinea\_pig, koala, porcupine, sloth

**Question 5:** Is your animal **domestic** in the dataset?

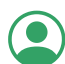

No.

We now have 3 possibilities, each about  $1/3 \approx 33$  percent likely:

- koala
- porcupine
- sloth

Question 6: **Can your animal swim?**

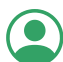

No.

### Current belief distribution

- koala: 100 percent

All other possibilities have been eliminated, so the only animal that fits every answer you gave is the koala.

**Conclusion:** Your hidden animal is the **koala**.
