# Supplementary material
Source: ML conference proceedings conference paper supplement (https://openreview.net/forum?id=1qLZsyJN2t)
Supplement: supplementary_material [file GPTo3_100 Synthetic.pdf › Optimal-Question-Asking-main/GPTo3_100 Synthetic.pdf]

# Object Guessing Game

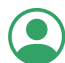

This is a synthetic attributes dataset. I have a hidden object in mind. You are allowed to ask me binary questions about the hidden object's attributes, so you can figure out what it is. After receiving an answer, at each step you must print your current belief distribution about the possible hidden object. We can stop when there are no more distinguishing attributes between the remaining options. (You're not allowed to solve this using programming.)

```
"{
  " 20": {
    "a": false,
    "b": false,
    "c": false,
    "d": false,
    "e": false,
    "f": true,
    "g": false,
    "h": false,
    "i": false,
    "j": false,
    "k": false
  },
  " 29": {
    "a": false,
    "b": false,
    "c": false,
    "d": false,
    "e": false,
    "f": true,
    "g": false,
    "h": true,
    "i": false,
    "j": false,
    "k": true
  },
  " 33": {
    "a": false,
    "b": false,
    "c": false,
    "d": false,
    "e": false,
    "f": true,
    "g": true,
    "h": false,
    "i": false,
    "j": true,
```

```

"k": true
},
" 4b": {
"a": false,
"b": false,
"c": false,
"d": false,
"e": true,
"f": false,
"g": false,
"h": true,
"i": false,
"j": true,
"k": true
},
" 52": {
"a": false,
"b": false,
"c": false,
"d": false,
"e": true,
"f": false,
"g": true,
"h": false,
"i": false,
"j": true,
"k": false
},
" 61": {
"a": false,
"b": false,
"c": false,
"d": false,
"e": true,
"f": true,
"g": false,
"h": false,
"i": false,
"j": false,
"k": true
},
" 63": {
"a": false,
"b": false,
"c": false,
"d": false,
"e": true,
"f": true,
"g": false,
"h": false,
"i": false,

```

```

    "j": true,
    "k": true
  },
  "69": {
    "a": false,
    "b": false,
    "c": false,
    "d": false,
    "e": true,
    "f": true,
    "g": false,
    "h": true,
    "i": false,
    "j": false,
    "k": true
  },
  "77": {
    "a": false,
    "b": false,
    "c": false,
    "d": false,
    "e": true,
    "f": true,
    "g": true,
    "h": false,
    "i": true,
    "j": true,
    "k": true
  },
  "9f": {
    "a": false,
    "b": false,
    "c": false,
    "d": true,
    "e": false,
    "f": false,
    "g": true,
    "h": true,
    "i": true,
    "j": true,
    "k": true
  },
  "b1": {
    "a": false,
    "b": false,
    "c": false,
    "d": true,
    "e": false,
    "f": true,
    "g": true,
    "h": false,

```

```

    "i": false,
    "j": false,
    "k": true
  },
  "c9": {
    "a": false,
    "b": false,
    "c": false,
    "d": true,
    "e": true,
    "f": false,
    "g": false,
    "h": true,
    "i": false,
    "j": false,
    "k": true
  },
  "cd": {
    "a": false,
    "b": false,
    "c": false,
    "d": true,
    "e": true,
    "f": false,
    "g": false,
    "h": true,
    "i": true,
    "j": false,
    "k": true
  },
  "dd": {
    "a": false,
    "b": false,
    "c": false,
    "d": true,
    "e": true,
    "f": false,
    "g": true,
    "h": true,
    "i": true,
    "j": false,
    "k": true
  },
  "e1": {
    "a": false,
    "b": false,
    "c": false,
    "d": true,
    "e": true,
    "f": true,
    "g": false,

```

```

"h": false,
"i": false,
"j": false,
"k": true
},
"    f7": {
"a": false,
"b": false,
"c": false,
"d": true,
"e": true,
"f": true,
"g": true,
"h": false,
"i": true,
"j": true,
"k": true
},
"    fa": {
"a": false,
"b": false,
"c": false,
"d": true,
"e": true,
"f": true,
"g": true,
"h": true,
"i": false,
"j": true,
"k": false
},
"    10e": {
"a": false,
"b": false,
"c": true,
"d": false,
"e": false,
"f": false,
"g": false,
"h": true,
"i": true,
"j": true,
"k": false
},
"    140": {
"a": false,
"b": false,
"c": true,
"d": false,
"e": true,
"f": false,

```

```

"g": false,
"h": false,
"i": false,
"j": false,
"k": false
},
" 153": {
"a": false,
"b": false,
"c": true,
"d": false,
"e": true,
"f": false,
"g": true,
"h": false,
"i": false,
"j": true,
"k": true
},
" 155": {
"a": false,
"b": false,
"c": true,
"d": false,
"e": true,
"f": false,
"g": true,
"h": false,
"i": true,
"j": false,
"k": true
},
" 17a": {
"a": false,
"b": false,
"c": true,
"d": false,
"e": true,
"f": true,
"g": true,
"h": true,
"i": false,
"j": true,
"k": false
},
" 180": {
"a": false,
"b": false,
"c": true,
"d": true,
"e": false,

```

```

"f": false,
"g": false,
"h": false,
"i": false,
"j": false,
"k": false
},
" 1b0": {
"a": false,
"b": false,
"c": true,
"d": true,
"e": false,
"f": true,
"g": true,
"h": false,
"i": false,
"j": false,
"k": false
},
" 1bc": {
"a": false,
"b": false,
"c": true,
"d": true,
"e": false,
"f": true,
"g": true,
"h": true,
"i": true,
"j": false,
"k": false
},
" 1ca": {
"a": false,
"b": false,
"c": true,
"d": true,
"e": true,
"f": false,
"g": false,
"h": true,
"i": false,
"j": true,
"k": false
},
" 1cb": {
"a": false,
"b": false,
"c": true,
"d": true,

```

```

"e": true,
"f": false,
"g": false,
"h": true,
"i": false,
"j": true,
"k": true
},
" 1cf": {
"a": false,
"b": false,
"c": true,
"d": true,
"e": true,
"f": false,
"g": false,
"h": true,
"i": true,
"j": true,
"k": true
},
" 1d5": {
"a": false,
"b": false,
"c": true,
"d": true,
"e": true,
"f": false,
"g": true,
"h": false,
"i": true,
"j": false,
"k": true
},
" 1ec": {
"a": false,
"b": false,
"c": true,
"d": true,
"e": true,
"f": true,
"g": false,
"h": true,
"i": true,
"j": false,
"k": false
},
" 1f5": {
"a": false,
"b": false,
"c": true,

```



```

"d": true,
"e": true,
"f": true,
"g": true,
"h": false,
"i": true,
"j": false,
"k": true
},
" 1fd": {
"a": false,
"b": false,
"c": true,
"d": true,
"e": true,
"f": true,
"g": true,
"h": true,
"i": true,
"j": false,
"k": true
},
" 220": {
"a": false,
"b": true,
"c": false,
"d": false,
"e": false,
"f": true,
"g": false,
"h": false,
"i": false,
"j": false,
"k": false
},
" 225": {
"a": false,
"b": true,
"c": false,
"d": false,
"e": false,
"f": true,
"g": false,
"h": false,
"i": true,
"j": false,
"k": true
},
" 228": {
"a": false,
"b": true,

```

```

"c": false,
"d": false,
"e": false,
"f": true,
"g": false,
"h": true,
"i": false,
"j": false,
"k": false
},
" 24a": {
"a": false,
"b": true,
"c": false,
"d": false,
"e": true,
"f": false,
"g": false,
"h": true,
"i": false,
"j": true,
"k": false
},
" 25b": {
"a": false,
"b": true,
"c": false,
"d": false,
"e": true,
"f": false,
"g": true,
"h": true,
"i": false,
"j": true,
"k": true
},
" 261": {
"a": false,
"b": true,
"c": false,
"d": false,
"e": true,
"f": true,
"g": false,
"h": false,
"i": false,
"j": false,
"k": true
},
" 262": {
"a": false,

```

```

    "b": true,
    "c": false,
    "d": false,
    "e": true,
    "f": true,
    "g": false,
    "h": false,
    "i": false,
    "j": true,
    "k": false
  },
  "263": {
    "a": false,
    "b": true,
    "c": false,
    "d": false,
    "e": true,
    "f": true,
    "g": false,
    "h": false,
    "i": false,
    "j": true,
    "k": true
  },
  "284": {
    "a": false,
    "b": true,
    "c": false,
    "d": true,
    "e": false,
    "f": false,
    "g": false,
    "h": false,
    "i": true,
    "j": false,
    "k": false
  },
  "28f": {
    "a": false,
    "b": true,
    "c": false,
    "d": true,
    "e": false,
    "f": false,
    "g": false,
    "h": true,
    "i": true,
    "j": true,
    "k": true
  },
  "29e": {

```

```

"a": false,
"b": true,
"c": false,
"d": true,
"e": false,
"f": false,
"g": true,
"h": true,
"i": true,
"j": true,
"k": false
},
" 2d1": {
"a": false,
"b": true,
"c": false,
"d": true,
"e": true,
"f": false,
"g": true,
"h": false,
"i": false,
"j": false,
"k": true
},
" 2eb": {
"a": false,
"b": true,
"c": false,
"d": true,
"e": true,
"f": true,
"g": false,
"h": true,
"i": false,
"j": true,
"k": true
},
" 300": {
"a": false,
"b": true,
"c": true,
"d": false,
"e": false,
"f": false,
"g": false,
"h": false,
"i": false,
"j": false,
"k": false
},

```

```
" 313": {  
  "a": false,  
  "b": true,  
  "c": true,  
  "d": false,  
  "e": false,  
  "f": false,  
  "g": true,  
  "h": false,  
  "i": false,  
  "j": true,  
  "k": true  
},  
" 33a": {  
  "a": false,  
  "b": true,  
  "c": true,  
  "d": false,  
  "e": false,  
  "f": true,  
  "g": true,  
  "h": true,  
  "i": false,  
  "j": true,  
  "k": false  
},  
" 35f": {  
  "a": false,  
  "b": true,  
  "c": true,  
  "d": false,  
  "e": true,  
  "f": false,  
  "g": true,  
  "h": true,  
  "i": true,  
  "j": true,  
  "k": true  
},  
" 37a": {  
  "a": false,  
  "b": true,  
  "c": true,  
  "d": false,  
  "e": true,  
  "f": true,  
  "g": true,  
  "h": true,  
  "i": false,  
  "j": true,  
  "k": false
```

```

},
" 37e": {
  "a": false,
  "b": true,
  "c": true,
  "d": false,
  "e": true,
  "f": true,
  "g": true,
  "h": true,
  "i": true,
  "j": true,
  "k": false
},
" 381": {
  "a": false,
  "b": true,
  "c": true,
  "d": true,
  "e": false,
  "f": false,
  "g": false,
  "h": false,
  "i": false,
  "j": false,
  "k": true
},
" 392": {
  "a": false,
  "b": true,
  "c": true,
  "d": true,
  "e": false,
  "f": false,
  "g": true,
  "h": false,
  "i": false,
  "j": true,
  "k": false
},
" 394": {
  "a": false,
  "b": true,
  "c": true,
  "d": true,
  "e": false,
  "f": false,
  "g": true,
  "h": false,
  "i": true,
  "j": false,

```

```

"k": false
},
" 396": {
"a": false,
"b": true,
"c": true,
"d": true,
"e": false,
"f": false,
"g": true,
"h": false,
"i": true,
"j": true,
"k": false
},
" 3a2": {
"a": false,
"b": true,
"c": true,
"d": true,
"e": false,
"f": true,
"g": false,
"h": false,
"i": false,
"j": true,
"k": false
},
" 3cf": {
"a": false,
"b": true,
"c": true,
"d": true,
"e": true,
"f": false,
"g": false,
"h": true,
"i": true,
"j": true,
"k": true
},
" 3e6": {
"a": false,
"b": true,
"c": true,
"d": true,
"e": true,
"f": true,
"g": false,
"h": false,
"i": true,

```

```

    "j": true,
    "k": false
  },
  "3e8": {
    "a": false,
    "b": true,
    "c": true,
    "d": true,
    "e": true,
    "f": true,
    "g": false,
    "h": true,
    "i": false,
    "j": false,
    "k": false
  },
  "40b": {
    "a": true,
    "b": false,
    "c": false,
    "d": false,
    "e": false,
    "f": false,
    "g": false,
    "h": true,
    "i": false,
    "j": true,
    "k": true
  },
  "418": {
    "a": true,
    "b": false,
    "c": false,
    "d": false,
    "e": false,
    "f": false,
    "g": true,
    "h": true,
    "i": false,
    "j": false,
    "k": false
  },
  "421": {
    "a": true,
    "b": false,
    "c": false,
    "d": false,
    "e": false,
    "f": true,
    "g": false,
    "h": false,

```



```

    "i": false,
    "j": false,
    "k": true
  },
  " 442": {
    "a": true,
    "b": false,
    "c": false,
    "d": false,
    "e": true,
    "f": false,
    "g": false,
    "h": false,
    "i": false,
    "j": true,
    "k": false
  },
  " 444": {
    "a": true,
    "b": false,
    "c": false,
    "d": false,
    "e": true,
    "f": false,
    "g": false,
    "h": false,
    "i": true,
    "j": false,
    "k": false
  },
  " 489": {
    "a": true,
    "b": false,
    "c": false,
    "d": true,
    "e": false,
    "f": false,
    "g": false,
    "h": true,
    "i": false,
    "j": false,
    "k": true
  },
  " 4a2": {
    "a": true,
    "b": false,
    "c": false,
    "d": true,
    "e": false,
    "f": true,
    "g": false,

```

```

    "h": false,
    "i": false,
    "j": true,
    "k": false
  },
  "4c1": {
    "a": true,
    "b": false,
    "c": false,
    "d": true,
    "e": true,
    "f": false,
    "g": false,
    "h": false,
    "i": false,
    "j": false,
    "k": true
  },
  "4de": {
    "a": true,
    "b": false,
    "c": false,
    "d": true,
    "e": true,
    "f": false,
    "g": true,
    "h": true,
    "i": true,
    "j": true,
    "k": false
  },
  "4e0": {
    "a": true,
    "b": false,
    "c": false,
    "d": true,
    "e": true,
    "f": true,
    "g": false,
    "h": false,
    "i": false,
    "j": false,
    "k": false
  },
  "4ee": {
    "a": true,
    "b": false,
    "c": false,
    "d": true,
    "e": true,
    "f": true,

```

```

"g": false,
"h": true,
"i": true,
"j": true,
"k": false
},
" 4f2": {
"a": true,
"b": false,
"c": false,
"d": true,
"e": true,
"f": true,
"g": true,
"h": false,
"i": false,
"j": true,
"k": false
},
" 4fc": {
"a": true,
"b": false,
"c": false,
"d": true,
"e": true,
"f": true,
"g": true,
"h": true,
"i": true,
"j": false,
"k": false
},
" 509": {
"a": true,
"b": false,
"c": true,
"d": false,
"e": false,
"f": false,
"g": false,
"h": true,
"i": false,
"j": false,
"k": true
},
" 50b": {
"a": true,
"b": false,
"c": true,
"d": false,
"e": false,

```

```

"f": false,
"g": false,
"h": true,
"i": false,
"j": true,
"k": true
},
" 519": {
"a": true,
"b": false,
"c": true,
"d": false,
"e": false,
"f": false,
"g": true,
"h": true,
"i": false,
"j": false,
"k": true
},
" 56f": {
"a": true,
"b": false,
"c": true,
"d": false,
"e": true,
"f": true,
"g": false,
"h": true,
"i": true,
"j": true,
"k": true
},
" 5a9": {
"a": true,
"b": false,
"c": true,
"d": true,
"e": false,
"f": true,
"g": false,
"h": true,
"i": false,
"j": false,
"k": true
},
" 5b7": {
"a": true,
"b": false,
"c": true,
"d": true,

```

```

    "e": false,
    "f": true,
    "g": true,
    "h": false,
    "i": true,
    "j": true,
    "k": true
  },
  "5d8": {
    "a": true,
    "b": false,
    "c": true,
    "d": true,
    "e": true,
    "f": false,
    "g": true,
    "h": true,
    "i": false,
    "j": false,
    "k": false
  },
  "5e1": {
    "a": true,
    "b": false,
    "c": true,
    "d": true,
    "e": true,
    "f": true,
    "g": false,
    "h": false,
    "i": false,
    "j": false,
    "k": true
  },
  "5fa": {
    "a": true,
    "b": false,
    "c": true,
    "d": true,
    "e": true,
    "f": true,
    "g": true,
    "h": true,
    "i": false,
    "j": true,
    "k": false
  },
  "625": {
    "a": true,
    "b": true,
    "c": false,

```

```

"d": false,
"e": false,
"f": true,
"g": false,
"h": false,
"i": true,
"j": false,
"k": true
},
" 67d": {
  "a": true,
  "b": true,
  "c": false,
  "d": false,
  "e": true,
  "f": true,
  "g": true,
  "h": true,
  "i": true,
  "j": false,
  "k": true
},
" 68a": {
  "a": true,
  "b": true,
  "c": false,
  "d": true,
  "e": false,
  "f": false,
  "g": false,
  "h": true,
  "i": false,
  "j": true,
  "k": false
},
" 697": {
  "a": true,
  "b": true,
  "c": false,
  "d": true,
  "e": false,
  "f": false,
  "g": true,
  "h": false,
  "i": true,
  "j": true,
  "k": true
},
" 69d": {
  "a": true,
  "b": true,

```

```

"c": false,
"d": true,
"e": false,
"f": false,
"g": true,
"h": true,
"i": true,
"j": false,
"k": true
},
" 6b0": {
"a": true,
"b": true,
"c": false,
"d": true,
"e": false,
"f": true,
"g": true,
"h": false,
"i": false,
"j": false,
"k": false
},
" 6be": {
"a": true,
"b": true,
"c": false,
"d": true,
"e": false,
"f": true,
"g": true,
"h": true,
"i": true,
"j": true,
"k": false
},
" 6bf": {
"a": true,
"b": true,
"c": false,
"d": true,
"e": false,
"f": true,
"g": true,
"h": true,
"i": true,
"j": true,
"k": true
},
" 6cf": {
"a": true,

```

```

    "b": true,
    "c": false,
    "d": true,
    "e": true,
    "f": false,
    "g": false,
    "h": true,
    "i": true,
    "j": true,
    "k": true
  },
  " 6ec": {
    "a": true,
    "b": true,
    "c": false,
    "d": true,
    "e": true,
    "f": true,
    "g": false,
    "h": true,
    "i": true,
    "j": false,
    "k": false
  },
  " 707": {
    "a": true,
    "b": true,
    "c": true,
    "d": false,
    "e": false,
    "f": false,
    "g": false,
    "h": false,
    "i": true,
    "j": true,
    "k": true
  },
  " 71a": {
    "a": true,
    "b": true,
    "c": true,
    "d": false,
    "e": false,
    "f": false,
    "g": true,
    "h": true,
    "i": false,
    "j": true,
    "k": false
  },
  " 722": {

```



```

"a": true,
"b": true,
"c": true,
"d": false,
"e": false,
"f": true,
"g": false,
"h": false,
"i": false,
"j": true,
"k": false
},
" 769": {
"a": true,
"b": true,
"c": true,
"d": false,
"e": true,
"f": true,
"g": false,
"h": true,
"i": false,
"j": false,
"k": true
},
" 78f": {
"a": true,
"b": true,
"c": true,
"d": true,
"e": false,
"f": false,
"g": false,
"h": true,
"i": true,
"j": true,
"k": true
},
" 7a3": {
"a": true,
"b": true,
"c": true,
"d": true,
"e": false,
"f": true,
"g": false,
"h": false,
"i": false,
"j": true,
"k": true
},

```

```
" 7c4": {
  "a": true,
  "b": true,
  "c": true,
  "d": true,
  "e": true,
  "f": false,
  "g": false,
  "h": false,
  "i": true,
  "j": false,
  "k": false
},
" 7c5": {
  "a": true,
  "b": true,
  "c": true,
  "d": true,
  "e": true,
  "f": false,
  "g": false,
  "h": false,
  "i": true,
  "j": false,
  "k": true
},
" 7f0": {
  "a": true,
  "b": true,
  "c": true,
  "d": true,
  "e": true,
  "f": true,
  "g": true,
  "h": false,
  "i": false,
  "j": false,
  "k": false
}
}"
```

Is attribute **a** true for your hidden object?

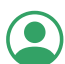

Yes.

Here's my current belief distribution, updated after learning that **a is true** (each remaining object is equally likely):

| Object ID | Probability             |
|-----------|-------------------------|
| 40b       | $1 / 41 \approx 0.0244$ |
| 418       | $1 / 41$                |
| 421       | $1 / 41$                |
| 442       | $1 / 41$                |
| 444       | $1 / 41$                |
| 489       | $1 / 41$                |
| 4a2       | $1 / 41$                |
| 4c1       | $1 / 41$                |
| 4de       | $1 / 41$                |
| 4e0       | $1 / 41$                |
| 4ee       | $1 / 41$                |
| 4f2       | $1 / 41$                |
| 4fc       | $1 / 41$                |
| 509       | $1 / 41$                |
| 50b       | $1 / 41$                |
| 519       | $1 / 41$                |
| 56f       | $1 / 41$                |
| 5a9       | $1 / 41$                |
| 5b7       | $1 / 41$                |
| 5d8       | $1 / 41$                |
| 5e1       | $1 / 41$                |
| 5fa       | $1 / 41$                |
| 625       | $1 / 41$                |
| 67d       | $1 / 41$                |
| 68a       | $1 / 41$                |
| 697       | $1 / 41$                |
| 69d       | $1 / 41$                |
| 6b0       | $1 / 41$                |
| 6be       | $1 / 41$                |
| 6bf       | $1 / 41$                |
| 6cf       | $1 / 41$                |
| 6ec       | $1 / 41$                |
| 707       | $1 / 41$                |
| 71a       | $1 / 41$                |
| 722       | $1 / 41$                |
| 769       | $1 / 41$                |
| 78f       | $1 / 41$                |

| Object ID | Probability |
|-----------|-------------|
| 7a3       | 1 / 41      |
| 7c4       | 1 / 41      |
| 7c5       | 1 / 41      |
| 7f0       | 1 / 41      |

### My next question:

Is attribute **b** true for your hidden object?

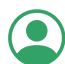

Yes.

Here's my updated belief distribution after learning that **b is true** (all remaining objects are equally likely):

| Object ID | Probability             |
|-----------|-------------------------|
| 625       | 1 / 19 $\approx$ 0.0526 |
| 67d       | 1 / 19                  |
| 68a       | 1 / 19                  |
| 697       | 1 / 19                  |
| 69d       | 1 / 19                  |
| 6b0       | 1 / 19                  |
| 6be       | 1 / 19                  |
| 6bf       | 1 / 19                  |
| 6cf       | 1 / 19                  |
| 6ec       | 1 / 19                  |
| 707       | 1 / 19                  |
| 71a       | 1 / 19                  |
| 722       | 1 / 19                  |
| 769       | 1 / 19                  |
| 78f       | 1 / 19                  |
| 7a3       | 1 / 19                  |
| 7c4       | 1 / 19                  |
| 7c5       | 1 / 19                  |
| 7f0       | 1 / 19                  |

### My next question:

Is attribute **c** true for your hidden object?

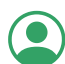

Yes.

Here's my updated belief distribution after learning that **c is true** (every remaining object is equally likely):

| Object ID | Probability         |
|-----------|---------------------|
| 707       | $1/9 \approx 0.111$ |
| 71a       | $1/9$               |
| 722       | $1/9$               |
| 769       | $1/9$               |
| 78f       | $1/9$               |
| 7a3       | $1/9$               |
| 7c4       | $1/9$               |
| 7c5       | $1/9$               |
| 7f0       | $1/9$               |

**My next question:**

Is attribute **d** true for your hidden object?

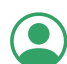

Yes.

Here's my updated belief distribution after learning that **d is true** (each remaining object is equally likely):

| Object ID | Probability  |
|-----------|--------------|
| 78f       | $1/5 = 0.20$ |
| 7a3       | $1/5 = 0.20$ |
| 7c4       | $1/5 = 0.20$ |
| 7c5       | $1/5 = 0.20$ |
| 7f0       | $1/5 = 0.20$ |

**My next question:**

Is attribute **e** true for your hidden object?

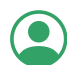

Yes.

Here's my updated belief distribution after learning that **e is true** (all remaining objects are equally likely):

| Object ID | Probability         |
|-----------|---------------------|
| 7c4       | $1/3 \approx 0.333$ |
| 7c5       | $1/3 \approx 0.333$ |
| 7f0       | $1/3 \approx 0.333$ |

### My next question:

Is attribute **f** true for your hidden object?

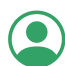

No.

Here's my updated belief distribution after learning that **f is false**:

| Object ID | Probability |
|-----------|-------------|
| 7c4       | 0.50        |
| 7c5       | 0.50        |

These two objects are identical on every remaining attribute except **k**.

### My next question:

Is attribute **k** true for your hidden object?

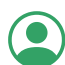

Yes.

Here's my updated belief distribution after learning that **k is true**:

| Object ID | Probability |
|-----------|-------------|
| 7c5       | 1.00        |

There's only one possible object left, so we're done.

**Your hidden object is 7c5.**
