# Supplementary material
Source: ML conference proceedings conference paper supplement (https://openreview.net/forum?id=1qLZsyJN2t)
Supplement: supplementary_material [file Grok3_100Animals.pdf › Optimal-Question-Asking-main/Grok3_100Animals.pdf]

To identify the hidden animal, I'll ask binary questions to systematically narrow down the possibilities from the 103 animals in the dataset. My goal is to minimize the number of questions by choosing attributes that split the remaining animals as evenly as possible. After each answer, I'll update the belief distribution, listing the remaining possible animals (assuming equal probability for simplicity). We'll stop when no distinguishing attributes remain.

### Question 1:

Is the hidden animal a mammal?

Please provide the answer (True or False), and I'll update the belief distribution accordingly.

Yes.

The hidden animal is a mammal (mammal: True). This eliminates all non-mammals from the dataset. Let's filter the animals based on this attribute.

### Step 1: Update Belief Distribution

From the dataset, the mammals (mammal: True) are:

- cat
- dog
- lion
- elephant
- whale
- kangaroo
- bat
- giraffe
- hippopotamus
- rhino
- tiger
- bear
- panda
- cow
- goat
- horse
- monkey
- gorilla

- zebra
- mouse
- otter
- hedgehog
- squirrel
- chimpanzee
- camel
- wolf
- fox
- raccoon
- sloth
- koala
- buffalo
- deer
- moose
- platypus
- echidna
- armadillo
- walrus
- seal
- porcupine
- donkey
- reindeer
- lemur
- dolphin
- hamster
- guinea\_pig

Total: 45 mammals.

**Belief Distribution:** Each of these 45 animals has an equal probability of being the hidden animal, i.e., approximately  $1/45 \approx 2.22\%$ .

## Question 2:

To narrow down further, I'll choose an attribute that splits these 45 mammals effectively. The "big" attribute (big: True vs. big: False) is a good candidate, as it divides the mammals into two sizable groups.

Is the hidden animal big (big: True)?

Please provide the answer (True or False).

The hidden animal is a mammal (mammal: True) and is not big (big: False). This further narrows down the list of possible animals.

## Step 2: Update Belief Distribution

From the 45 mammals, we now filter for those with big: False. The mammals with big: False are:

- cat
- dog
- bat
- goat
- monkey
- mouse
- otter
- hedgehog
- squirrel
- chimpanzee
- wolf
- fox
- raccoon
- sloth
- koala
- platypus
- echidna
- armadillo
- seal
- porcupine
- donkey
- lemur
- dolphin
- hamster
- guinea\_pig

Total: 25 animals.

**Belief Distribution:** Each of these 25 animals has an equal probability of being the hidden animal, i.e.,  $1/25 = 4\%$ .

### Question 3:

To further narrow down the list, I'll choose the "has\_fur" attribute, as it splits the remaining animals into two groups. Among the 25 animals, some have fur (has\_fur: True) and some do not (has\_fur: False, e.g., dolphin, armadillo, seal).

Does the hidden animal have fur (has\_fur: True)?

Please provide the answer (True or False).

Yes.

The hidden animal is a mammal (mammal: True), not big (big: False), and has fur (has\_fur: True). This further narrows down the list of possible animals.

### Step 3: Update Belief Distribution

From the 25 mammals with big: False, we now filter for those with has\_fur: True. The animals that meet these criteria are:

- cat
- dog
- bat
- goat
- monkey
- mouse
- otter
- hedgehog
- squirrel
- chimpanzee
- wolf
- fox
- raccoon
- sloth
- koala
- platypus
- echidna

- porcupine
- donkey
- lemur
- hamster
- guinea\_pig

Total: 22 animals.

**Belief Distribution:** Each of these 22 animals has an equal probability of being the hidden animal, i.e.,  $1/22 \approx 4.55\%$ .

#### Question 4:

To narrow down further, I'll use the "domestic" attribute, as it splits the remaining animals into domestic and non-domestic groups. Among the 22 animals, some are domestic (e.g., cat, dog, goat, donkey, hamster, guinea\_pig) and others are not.

Is the hidden animal domestic (domestic: True)?

Please provide the answer (True or False).

No.

The hidden animal is a mammal (mammal: True), not big (big: False), has fur (has\_fur: True), and is not domestic (domestic: False). This further narrows down the list of possible animals.

#### Step 4: Update Belief Distribution

From the 22 mammals with big: False and has\_fur: True, we now filter for those with domestic: False. The animals that meet these criteria are:

- bat
- monkey
- mouse
- otter
- hedgehog
- squirrel
- chimpanzee
- wolf
- fox

- raccoon
- sloth
- koala
- platypus
- echidna
- lemur

Total: 15 animals.

**Belief Distribution:** Each of these 15 animals has an equal probability of being the hidden animal, i.e.,  $1/15 \approx 6.67\%$ .

### Question 5:

To narrow down further, I'll use the "can\_swim" attribute, as it splits the remaining animals. Among the 15 animals, some can swim (e.g., otter, raccoon, sloth, platypus) and others cannot (e.g., bat, monkey, mouse, hedgehog, squirrel, chimpanzee, fox, koala, echidna, lemur).

Can the hidden animal swim (can\_swim: True)?

Please provide the answer (True or False).

No.

The hidden animal is a mammal (mammal: True), not big (big: False), has fur (has\_fur: True), is not domestic (domestic: False), and cannot swim (can\_swim: False). This further narrows down the list of possible animals.

### Step 5: Update Belief Distribution

From the 15 mammals with big: False, has\_fur: True, and domestic: False, we now filter for those with can\_swim: False. The animals that meet these criteria are:

- bat
- monkey
- mouse
- hedgehog
- squirrel
- chimpanzee
- fox
- koala

- echidna
- lemur

Total: 10 animals.

**Belief Distribution:** Each of these 10 animals has an equal probability of being the hidden animal, i.e.,  $1/10 = 10\%$ .

### Question 6:

To narrow down further, I'll use the "carnivore" attribute, as it splits the remaining animals. Among the 10 animals, some are carnivores (e.g., hedgehog, fox, echidna), while others are not (e.g., bat, monkey, mouse, squirrel, chimpanzee, koala, lemur).

Is the hidden animal a carnivore (carnivore: True)?

Please provide the answer (True or False).

No.

The hidden animal is a mammal (mammal: True), not big (big: False), has fur (has\_fur: True), is not domestic (domestic: False), cannot swim (can\_swim: False), and is not a carnivore (carnivore: False). This further narrows down the list of possible animals.

### Step 6: Update Belief Distribution

From the 10 mammals with big: False, has\_fur: True, domestic: False, and can\_swim: False, we now filter for those with carnivore: False. The animals that meet these criteria are:

- bat
- monkey
- mouse
- squirrel
- chimpanzee
- koala
- lemur

Total: 7 animals.

**Belief Distribution:** Each of these 7 animals has an equal probability of being the hidden animal, i.e.,  $1/7 \approx 14.29\%$ .

### Question 7:

To narrow down further, I'll use the "herbivore" attribute, as it splits the remaining animals. Among the 7 animals, koala is an herbivore (herbivore: True), while the others (bat, monkey, mouse, squirrel, chimpanzee, lemur) are not (herbivore: False).

Is the hidden animal an herbivore (herbivore: True)?

Please provide the answer (True or False).

Yes.

The hidden animal is a mammal (mammal: True), not big (big: False), has fur (has\_fur: True), is not domestic (domestic: False), cannot swim (can\_swim: False), is not a carnivore (carnivore: False), and is an herbivore (herbivore: True). This further narrows down the list of possible animals.

### Step 7: Update Belief Distribution

From the 7 mammals with big: False, has\_fur: True, domestic: False, can\_swim: False, and carnivore: False, we now filter for those with herbivore: True. The only animal that meets these criteria is:

- koala

Total: 1 animal.

**Belief Distribution:** The hidden animal is the koala with 100% probability.

### Conclusion

Based on the answers provided, the hidden animal is uniquely identified as the **koala**. No further questions are needed, as there are no remaining animals to distinguish from. If you confirm this is correct, we can stop here. If you believe there's an error, please let me know, and we can review the steps!
