# Supplementary material
Source: ML conference proceedings conference paper supplement (https://openreview.net/forum?id=1qLZsyJN2t)
Supplement: supplementary_material [file Grok3_100Places.pdf › Optimal-Question-Asking-main/Grok3_100Places.pdf]

To identify the hidden place, I'll ask binary questions to maximize information gain, aiming to reduce the number of possible places efficiently. After each answer, I'll update the belief distribution (probability of each place being the hidden one) and calculate the entropy drop to quantify the information gained. The process stops when no distinguishing attributes remain or the place is identified.

## Step 1: First Question

To split the 111 places as evenly as possible, I'll choose an attribute that divides the dataset into two roughly equal groups. The attribute **city** is a good candidate because many places are cities, and many are not.

### Question 1: Is the hidden place a city?

Please answer "Yes" or "No," and I'll proceed with the belief distribution and entropy calculation.

---

#### Initial Belief Distribution:

With 111 places and no information, each place has an equal probability:

- Probability per place =  $1/111 \approx 0.009009$ .
- Initial entropy  $H_0$ :

$$H_0 = - \sum_{i=1}^{111} \left( \frac{1}{111} \log_2 \frac{1}{111} \right) = -111 \cdot \frac{1}{111} \log_2 \frac{1}{111} = \log_2 111 \approx 6.794 \text{ bits}.$$

Once you provide the answer, I'll:

1. Filter the places based on your response.
2. Update the belief distribution (uniform over remaining places).
3. Calculate the new entropy and the entropy drop ( $H_0 - H_1$ ).
4. Choose the next question to maximize information gain.

Please provide your answer to the first question!

↻ 📄 ⬆️ 👍 💬 ...

False.

Thank you for answering "No" to the question "Is the hidden place a city?" This means the hidden place is **not a city**. I'll now update the belief distribution, calculate the entropy drop, and propose the next

question.

---

## Step 1: Update Based on Answer

From the dataset, I'll filter out all places where `city: True`. The remaining places have `city: False`. Let's identify them:

**Places with `city: False` (non-cities):**

- Amazon Rainforest
- Angkor Wat
- Antelope Canyon
- Banff National Park
- Black Forest
- Bora Bora
- Bryce Canyon National Park
- Canary Islands
- Chichen Itza
- Cinque Terre
- Death Valley
- Etosha National Park
- Fiordland National Park
- Galapagos Islands
- Giant's Causeway
- Grand Canyon
- Great Barrier Reef
- Great Ocean Road
- Ha Long Bay
- Hawaii Volcanoes National Park
- Iguazu Falls
- Jeju Island
- Kruger National Park
- Lake Baikal
- Lake Titicaca
- Machu Picchu
- Mont Blanc
- Mount Etna
- Mount Everest
- Mount Fuji

- Mount Kilimanjaro
- Mount Rainier National Park
- Mount Sinai
- Namib Desert
- Niagara Falls
- Pamukkale
- Patagonia
- Petra
- Plitvice Lakes
- Pyramids of Giza
- Rapa Nui
- Sahara Desert
- Salar de Uyuni
- Seychelles
- Skellig Michael
- Stonehenge
- Svalbard
- Table Mountain
- Taj Mahal
- The Dead Sea
- The Great Wall of China
- Uluru
- Victoria Falls
- Yellowstone National Park
- Yosemite National Park
- Zhangjiajie
- Zion National Park

**Count:** There are 57 places with `city: False`.

---

## Belief Distribution

With 57 remaining places, the belief distribution is uniform over these places:

- Probability per place =  $\frac{1}{57} \approx 0.01754$ .

## Entropy Calculation:

- New entropy  $H_1$ :

$$H_1 = - \sum_{i=1}^{57} \left( \frac{1}{57} \log_2 \frac{1}{57} \right) = -57 \cdot \frac{1}{57} \log_2 \frac{1}{57} = \log_2 57 \approx 5.836 \text{bits}.$$

- Initial entropy  $H_0$ :

$$H_0 = \log_2 111 \approx 6.794 \text{bits}.$$

- Entropy Drop:

$$\Delta H = H_0 - H_1 \approx 6.794 - 5.836 = 0.958 \text{bits}.$$

This drop indicates the information gained by ruling out 54 city places.

---

## Step 2: Next Question

To further narrow down the 57 places, I'll choose an attribute that splits them as evenly as possible to maximize information gain. The attribute **coastal** is a good candidate, as it divides natural and cultural sites into coastal and non-coastal groups.

Count for **coastal** among the 57 places:

- **Coastal: True:** Bora Bora, Canary Islands, Cinque Terre, Fiordland National Park, Galapagos Islands, Giant's Causeway, Great Barrier Reef, Great Ocean Road, Ha Long Bay, Hawaii Volcanoes National Park, Jeju Island, Mount Etna, Namib Desert, Patagonia, Rapa Nui, Seychelles, Skellig Michael, Stonehenge, Svalbard, Table Mountain, The Dead Sea (21 places).
- **Coastal: False:** Amazon Rainforest, Angkor Wat, Antelope Canyon, Banff National Park, Black Forest, Bryce Canyon National Park, Chichen Itza, Death Valley, Etosha National Park, Grand Canyon, Iguazu Falls, Kruger National Park, Lake Baikal, Lake Titicaca, Machu Picchu, Mont Blanc, Mount Everest, Mount Fuji, Mount Kilimanjaro, Mount Rainier National Park, Mount Sinai, Niagara Falls, Pamukkale, Petra, Plitvice Lakes, Pyramids of Giza, Sahara Desert, Salar de Uyuni, Taj Mahal, The Great Wall of China, Uluru, Victoria Falls, Yellowstone National Park, Yosemite National Park, Zhangjiajie, Zion National Park (36 places).

The split is 21 (coastal) vs. 36 (non-coastal), which is reasonably balanced.

## Question 2: Is the hidden place coastal?

Please answer "Yes" or "No," and I'll update the belief distribution and calculate the entropy drop again.

---

## Summary:

- **Remaining Places:** 57 (listed above).
- **Belief Distribution:** Each place has probability  $\frac{1}{57} \approx 0.01754$ .
- **Entropy Drop from Question 1:** 0.958 bits.

- **Next Question:** Is the hidden place coastal?

No.

Thank you for answering "No" to the question "Is the hidden place coastal?" This means the hidden place is **not coastal** and is also **not a city** (from the previous answer). I'll update the belief distribution, calculate the entropy drop, and propose the next question.

---

## Step 2: Update Based on Answer

From the 57 non-city places, I'll filter out those with **coastal: True**, keeping only those with **coastal: False**. From the previous step, the non-coastal, non-city places are:

- Amazon Rainforest
- Angkor Wat
- Antelope Canyon
- Banff National Park
- Black Forest
- Bryce Canyon National Park
- Chichen Itza
- Death Valley
- Etosha National Park
- Grand Canyon
- Iguazu Falls
- Kruger National Park
- Lake Baikal
- Lake Titicaca
- Machu Picchu
- Mont Blanc
- Mount Everest
- Mount Fuji
- Mount Kilimanjaro
- Mount Rainier National Park
- Mount Sinai
- Niagara Falls
- Pamukkale

- Petra
- Plitvice Lakes
- Pyramids of Giza
- Sahara Desert
- Salar de Uyuni
- Taj Mahal
- The Great Wall of China
- Uluru
- Victoria Falls
- Yellowstone National Park
- Yosemite National Park
- Zhangjiajie
- Zion National Park

**Count:** There are 36 places with `city: False` and `coastal: False`.

---

## Belief Distribution

With 36 remaining places, the belief distribution is uniform over these places:

- Probability per place =  $\frac{1}{36} \approx 0.02778$ .

## Entropy Calculation:

- New entropy  $H_2$ :

$$H_2 = - \sum_{i=1}^{36} \left( \frac{1}{36} \log_2 \frac{1}{36} \right) = -36 \cdot \frac{1}{36} \log_2 \frac{1}{36} = \log_2 36 \approx 5.170 \text{ bits.}$$

- Previous entropy  $H_1$ :

$$H_1 = \log_2 57 \approx 5.836 \text{ bits.}$$

- **Entropy Drop:**

$$\Delta H = H_1 - H_2 \approx 5.836 - 5.170 = 0.666 \text{ bits.}$$

This drop reflects the information gained by ruling out 21 coastal places.

---

## Step 3: Next Question

To narrow down the 36 places, I'll choose an attribute that splits them as evenly as possible. The attribute `natural_site` is a good candidate, as many non-city, non-coastal places are natural sites, while others are

cultural or neither.

Count for **natural\_site** among the 36 places:

- **Natural\_site: True:** Amazon Rainforest, Antelope Canyon, Banff National Park, Black Forest, Bryce Canyon National Park, Death Valley, Etosha National Park, Grand Canyon, Iguazu Falls, Kruger National Park, Lake Baikal, Lake Titicaca, Mont Blanc, Mount Everest, Mount Kilimanjaro, Mount Rainier National Park, Niagara Falls, Pamukkale, Plitvice Lakes, Sahara Desert, Salar de Uyuni, Uluru, Victoria Falls, Yellowstone National Park, Yosemite National Park, Zhangjiajie, Zion National Park (27 places).
- **Natural\_site: False:** Angkor Wat, Chichen Itza, Machu Picchu, Mount Fuji, Mount Sinai, Petra, Pyramids of Giza, Taj Mahal, The Great Wall of China (9 places).

The split is 27 (natural site) vs. 9 (not natural site), which is somewhat unbalanced but still informative, as it separates natural landmarks from cultural ones.

**Question 3: Is the hidden place a natural site?**

Please answer "Yes" or "No," and I'll update the belief distribution and calculate the entropy drop again.

---

**Summary:**

- **Remaining Places:** 36 (listed above).
- **Belief Distribution:** Each place has probability  $\frac{1}{36} \approx 0.02778$ .
- **Entropy Drop from Question 2:** 0.666 bits.
- **Next Question:** Is the hidden place a natural site?

Yes.

Thank you for answering "Yes" to the question "Is the hidden place a natural site?" This means the hidden place is **not a city**, **not coastal**, and **a natural site**. I'll update the belief distribution, calculate the entropy drop, and propose the next question.

---

**Step 3: Update Based on Answer**

From the 36 non-city, non-coastal places, I'll filter those with **natural\_site: True**. From the previous step, these are:

- Amazon Rainforest
- Antelope Canyon

- Banff National Park
- Black Forest
- Bryce Canyon National Park
- Death Valley
- Etosha National Park
- Grand Canyon
- Iguazu Falls
- Kruger National Park
- Lake Baikal
- Lake Titicaca
- Mont Blanc
- Mount Everest
- Mount Kilimanjaro
- Mount Rainier National Park
- Niagara Falls
- Pamukkale
- Plitvice Lakes
- Sahara Desert
- Salar de Uyuni
- Uluru
- Victoria Falls
- Yellowstone National Park
- Yosemite National Park
- Zhangjiajie
- Zion National Park

**Count:** There are 27 places with `city: False` , `coastal: False` , and `natural_site: True` .

---

## Belief Distribution

With 27 remaining places, the belief distribution is uniform over these places:

- Probability per place =  $\frac{1}{27} \approx 0.03704$ .

## Entropy Calculation:

- New entropy  $H_3$ :

$$H_3 = - \sum_{i=1}^{27} \left( \frac{1}{27} \log_2 \frac{1}{27} \right) = -27 \cdot \frac{1}{27} \log_2 \frac{1}{27} = \log_2 27 \approx 4.755 \text{ bits.}$$



- Previous entropy  $H_2$ :

$$H_2 = \log_2 36 \approx 5.170 \text{bits}.$$

- Entropy Drop:

$$\Delta H = H_2 - H_3 \approx 5.170 - 4.755 = 0.415 \text{bits}.$$

This drop reflects the information gained by ruling out 9 non-natural-site places.

---

#### Step 4: Next Question

To narrow down the 27 places, I'll choose an attribute that splits them as evenly as possible. The attribute **mountainous** is a good candidate, as it distinguishes between mountainous and non-mountainous natural sites.

Count for **mountainous** among the 27 places:

- **Mountainous: True:** Banff National Park, Black Forest, Bryce Canyon National Park, Death Valley, Lake Baikal, Lake Titicaca, Mont Blanc, Mount Everest, Mount Kilimanjaro, Mount Rainier National Park, Plitvice Lakes, Uluru, Yellowstone National Park, Yosemite National Park, Zhangjiajie, Zion National Park (16 places).
- **Mountainous: False:** Amazon Rainforest, Antelope Canyon, Etosha National Park, Grand Canyon, Iguazu Falls, Kruger National Park, Niagara Falls, Pamukkale, Sahara Desert, Salar de Uyuni, Victoria Falls (11 places).

The split is 16 (mountainous) vs. 11 (not mountainous), which is fairly balanced.

#### Question 4: Is the hidden place mountainous?

Please answer "Yes" or "No," and I'll update the belief distribution and calculate the entropy drop again.

---

#### Summary:

- **Remaining Places:** 27 (listed above).
- **Belief Distribution:** Each place has probability  $\frac{1}{27} \approx 0.03704$ .
- **Entropy Drop from Question 3:** 0.415 bits.
- **Next Question:** Is the hidden place mountainous?

No.

Thank you for answering "No" to the question "Is the hidden place mountainous?" This means the hidden place is **not a city, not coastal, a natural site, and not mountainous**. I'll update the belief distribution, calculate the entropy drop, and propose the next question.

---

#### Step 4: Update Based on Answer

From the 27 non-city, non-coastal, natural-site places, I'll filter those with **mountainous: False**. From the previous step, these are:

- Amazon Rainforest
- Antelope Canyon
- Etosha National Park
- Grand Canyon
- Iguazu Falls
- Kruger National Park
- Niagara Falls
- Pamukkale
- Sahara Desert
- Salar de Uyuni
- Victoria Falls

**Count:** There are 11 places with **city: False, coastal: False, natural\_site: True, and mountainous: False**.

---

#### Belief Distribution

With 11 remaining places, the belief distribution is uniform over these places:

- Probability per place =  $\frac{1}{11} \approx 0.09091$ .

#### Entropy Calculation:

- New entropy  $H_4$ :

$$H_4 = - \sum_{i=1}^{11} \left( \frac{1}{11} \log_2 \frac{1}{11} \right) = -11 \cdot \frac{1}{11} \log_2 \frac{1}{11} = \log_2 11 \approx 3.459 \text{ bits.}$$

- Previous entropy  $H_3$ :

$$H_3 = \log_2 27 \approx 4.755 \text{ bits.}$$

- **Entropy Drop:**

$$\Delta H = H_3 - H_4 \approx 4.755 - 3.459 = 1.296 \text{ bits.}$$

This drop reflects the information gained by ruling out 16 mountainous places.

---

### Step 5: Next Question

To narrow down the 11 places, I'll choose an attribute that splits them as evenly as possible. The attribute **tropical** is a good candidate, as it distinguishes between tropical and non-tropical natural sites.

Count for **tropical** among the 11 places:

- **Tropical: True:** Amazon Rainforest, Etosha National Park, Iguazu Falls, Kruger National Park, Victoria Falls (5 places).
- **Tropical: False:** Antelope Canyon, Grand Canyon, Niagara Falls, Pamukkale, Sahara Desert, Salar de Uyuni (6 places).

The split is 5 (tropical) vs. 6 (not tropical), which is nearly balanced.

### Question 5: Is the hidden place tropical?

Please answer "Yes" or "No," and I'll update the belief distribution and calculate the entropy drop again.

---

### Summary:

- **Remaining Places:** 11 (Amazon Rainforest, Antelope Canyon, Etosha National Park, Grand Canyon, Iguazu Falls, Kruger National Park, Niagara Falls, Pamukkale, Sahara Desert, Salar de Uyuni, Victoria Falls).
- **Belief Distribution:** Each place has probability  $\frac{1}{11} \approx 0.09091$ .
- **Entropy Drop from Question 4:** 1.296 bits.
- **Next Question:** Is the hidden place tropical?

Yes.

Thank you for answering "Yes" to the question "Is the hidden place tropical?" This means the hidden place is **not a city**, **not coastal**, **a natural site**, **not mountainous**, and **tropical**. I'll update the belief distribution, calculate the entropy drop, and propose the next question.

---

### Step 5: Update Based on Answer

From the 11 non-city, non-coastal, natural-site, non-mountainous places, I'll filter those with **tropical: True**. From the previous step, these are:

- Amazon Rainforest
- Etosha National Park
- Iguazu Falls
- Kruger National Park
- Victoria Falls

**Count:** There are 5 places with `city: False`, `coastal: False`, `natural_site: True`, `mountainous: False`, and `tropical: True`.

---

## Belief Distribution

With 5 remaining places, the belief distribution is uniform over these places:

- Probability per place =  $\frac{1}{5} = 0.2$ .

### Entropy Calculation:

- New entropy  $H_5$ :

$$H_5 = - \sum_{i=1}^5 \left( \frac{1}{5} \log_2 \frac{1}{5} \right) = -5 \cdot \frac{1}{5} \log_2 \frac{1}{5} = \log_2 5 \approx 2.322 \text{ bits}.$$

- Previous entropy  $H_4$ :

$$H_4 = \log_2 11 \approx 3.459 \text{ bits}.$$

- **Entropy Drop:**

$$\Delta H = H_4 - H_5 \approx 3.459 - 2.322 = 1.137 \text{ bits}.$$

This drop reflects the information gained by ruling out 6 non-tropical places.

---

## Step 6: Next Question

To narrow down the 5 places, I'll choose an attribute that splits them as evenly as possible. The attribute `unesco` is a good candidate, as it distinguishes between UNESCO and non-UNESCO sites.

**Count for `unesco`** among the 5 places:

- **Unesco: True:** Iguazu Falls, Victoria Falls (2 places).
- **Unesco: False:** Amazon Rainforest, Etosha National Park, Kruger National Park (3 places).

The split is 2 (UNESCO) vs. 3 (not UNESCO), which is as balanced as possible for 5 places.

### Question 6: Is the hidden place a UNESCO site?

Please answer "Yes" or "No," and I'll update the belief distribution and calculate the entropy drop again.

---

### Summary:

- **Remaining Places:** 5 (Amazon Rainforest, Etosha National Park, Iguazu Falls, Kruger National Park, Victoria Falls).
- **Belief Distribution:** Each place has probability  $\frac{1}{5} = 0.2$ .
- **Entropy Drop from Question 5:** 1.137 bits.
- **Next Question:** Is the hidden place a UNESCO site?

Yes.

Thank you for answering "Yes" to the question "Is the hidden place a UNESCO site?" This means the hidden place is **not a city, not coastal, a natural site, not mountainous, tropical, and a UNESCO site**. I'll update the belief distribution, calculate the entropy drop, and determine the next step.

---

### Step 6: Update Based on Answer

From the 5 non-city, non-coastal, natural-site, non-mountainous, tropical places, I'll filter those with **unesco: True**. From the previous step, these are:

- Iguazu Falls
- Victoria Falls

**Count:** There are 2 places with **city: False, coastal: False, natural\_site: True, mountainous: False, tropical: True, and unesco: True**.

---

### Belief Distribution

With 2 remaining places, the belief distribution is uniform over these places:

- Probability per place =  $\frac{1}{2} = 0.5$ .

### Entropy Calculation:

- New entropy  $H_6$ :

$$H_6 = - \sum_{i=1}^2 \left( \frac{1}{2} \log_2 \frac{1}{2} \right) = -2 \cdot \frac{1}{2} \log_2 \frac{1}{2} = -1 \cdot (-1) = 1 \text{ bit.}$$

- Previous entropy  $H_5$ :

$$H_5 = \log_2 5 \approx 2.322 \text{bits}.$$

- Entropy Drop:

$$\Delta H = H_5 - H_6 \approx 2.322 - 1 = 1.322 \text{bits}.$$

This drop reflects the information gained by ruling out 3 non-UNESCO places.

---

## Step 7: Check for Distinguishing Attributes

With only 2 places remaining (Iguazu Falls and Victoria Falls), I'll check if there are any distinguishing attributes between them to ask a final question. Let's compare their attributes:

| Attribute        | Iguazu Falls | Victoria Falls |
|------------------|--------------|----------------|
| city             | False        | False          |
| capital_city     | False        | False          |
| coastal          | False        | False          |
| island           | False        | False          |
| mountainous      | False        | False          |
| desert           | False        | False          |
| tropical         | True         | True           |
| cold             | False        | True           |
| natural_site     | True         | True           |
| cultural_site    | False        | False          |
| unesco           | True         | True           |
| tourist_hotspot  | True         | True           |
| population_large | False        | False          |

The only differing attribute is **cold**:

- Iguazu Falls: **cold: False**
- Victoria Falls: **cold: True**

This allows for a final distinguishing question.

### Question 7: Is the hidden place cold?

Please answer "Yes" or "No," and I'll identify the hidden place, update the belief distribution, and calculate the final entropy drop.

---

#### Summary:

- **Remaining Places:** 2 (Iguazu Falls, Victoria Falls).
- **Belief Distribution:** Each place has probability  $\frac{1}{2} = 0.5$ .
- **Entropy Drop from Question 6:** 1.322 bits.
- **Next Question:** Is the hidden place cold?

Yes.

Thank you for answering "Yes" to the question "Is the hidden place cold?" This means the hidden place is **not a city, not coastal, a natural site, not mountainous, tropical, a UNESCO site, and cold**. I'll update the belief distribution, calculate the entropy drop, and identify the hidden place.

---

### Step 7: Update Based on Answer

From the 2 remaining places (Iguazu Falls and Victoria Falls), I'll filter those with **cold: True**. Based on the attributes:

- Iguazu Falls: **cold: False**
- Victoria Falls: **cold: True**

Only **Victoria Falls** satisfies **cold: True**.

**Count:** There is 1 place remaining: Victoria Falls.

---

### Belief Distribution

With only 1 place remaining, the belief distribution assigns all probability to Victoria Falls:

- Probability of Victoria Falls = 1.0.
- Probability of all other places = 0.0.

### Entropy Calculation:

- New entropy  $H_7$ :

$$H_7 = - \sum_{i=1}^1 (1 \log_2 1) = -1 \cdot 0 = 0 \text{ bits}.$$

(Since  $\log_2 1 = 0$ , and all other probabilities are 0, entropy is 0 when one outcome is certain.)

- Previous entropy  $H_6$ :

$$H_6 = \log_2 2 = 1 \text{ bit}.$$

- Entropy Drop:

$$\Delta H = H_6 - H_7 = 1 - 0 = 1 \text{ bit}.$$

This drop reflects the information gained by identifying the exact place.

---

## Conclusion

The hidden place is **Victoria Falls**, as it is the only place that satisfies all the given attributes:

- `city: False`
- `coastal: False`
- `natural_site: True`
- `mountainous: False`
- `tropical: True`
- `unesco: True`
- `cold: True`

Since only one place remains and no further distinguishing attributes are needed, the process stops here.

---

## Final Summary:

- **Hidden Place:** Victoria Falls.
- **Remaining Places:** 1 (Victoria Falls).
- **Belief Distribution:** Probability of Victoria Falls = 1.0.
- **Entropy Drop from Question 7:** 1 bit.
- **Total Questions Asked:** 7.

If you'd like to confirm or restart with a new hidden place, let me know!
