# Supplementary material
Source: ML conference proceedings conference paper supplement (https://openreview.net/forum?id=1qLZsyJN2t)
Supplement: supplementary_material [file Grok3_100Synthetic.pdf › Optimal-Question-Asking-main/Grok3_100Synthetic.pdf]

To identify the hidden object, I'll ask binary (yes/no) questions about its attributes, aiming to maximize information gain by splitting the 78 objects as evenly as possible. After each answer, I'll update the belief distribution, assuming equal prior probability ( $1/78 \approx 0.0128$  for each object). I'll stop when the remaining objects are indistinguishable (i.e., have identical attribute profiles) or a single object is identified.

## Step 1: Choose the First Question

To select the best question, I'll look for an attribute that splits the 78 objects into two groups as close to equal as possible. Let's count the number of objects with each attribute set to **true** :

- **Attribute a:** True for objects 40b, 418, 421, 442, 444, 489, 4a2, 4c1, 4de, 4e0, 4ee, 4f2, 4fc, 509, 50b, 519, 56f, 5a9, 5b7, 5d8, 5e1, 5fa, 625, 67d, 68a, 697, 69d, 6b0, 6be, 6bf, 6cf, 6ec, 707, 71a, 722, 769, 78f, 7a3, 7c4, 7c5, 7f0 (39 objects).
- **Attribute b:** True for objects 220, 225, 228, 24a, 25b, 261, 262, 263, 284, 28f, 29e, 2d1, 2eb, 300, 313, 33a, 35f, 37a, 37e, 381, 392, 394, 396, 3a2, 3cf, 3e6, 3e8, 625, 67d, 68a, 697, 69d, 6b0, 6be, 6bf, 6cf, 6ec, 707, 71a, 722, 769, 78f, 7a3, 7c4, 7c5, 7f0 (46 objects).
- **Attribute c:** True for objects 10e, 140, 153, 155, 17a, 180, 1b0, 1bc, 1ca, 1cb, 1cf, 1d5, 1ec, 1f5, 1fd, 300, 313, 33a, 35f, 37a, 37e, 381, 392, 394, 396, 3a2, 3cf, 3e6, 3e8, 509, 50b, 519, 56f, 5a9, 5b7, 5d8, 5e1, 5fa, 707, 71a, 722, 769, 78f, 7a3, 7c4, 7c5, 7f0 (47 objects).
- **Attribute d:** True for objects 9f, b1, c9, cd, dd, e1, f7, fa, 180, 1b0, 1bc, 1ca, 1cb, 1cf, 1d5, 1ec, 1f5, 1fd, 284, 28f, 29e, 2d1, 2eb, 381, 392, 394, 396, 3a2, 3cf, 3e6, 3e8, 489, 4a2, 4c1, 4de, 4e0, 4ee, 4f2, 4fc, 5a9, 5b7, 5d8, 5e1, 5fa, 68a, 697, 69d, 6b0, 6be, 6bf, 6cf, 6ec, 78f, 7a3, 7c4, 7c5, 7f0 (56 objects).
- **Attribute e:** True for objects 4b, 52, 61, 63, 69, 77, c9, cd, dd, e1, f7, fa, 140, 153, 155, 17a, 1ca, 1cb, 1cf, 1d5, 1ec, 1f5, 1fd, 24a, 25b, 261, 262, 263, 2d1, 2eb, 3cf, 3e6, 3e8, 442, 444, 4c1, 4de, 4e0, 4ee, 4f2, 4fc, 5d8, 5e1, 5fa, 67d, 6cf, 6ec, 769, 7c4, 7c5, 7f0 (50 objects).
- **Attribute f:** True for objects 20, 29, 33, 61, 63, 69, 77, b1, e1, f7, fa, 1b0, 1bc, 1ec, 1f5, 1fd, 220, 225, 228, 261, 262, 263, 33a, 37a, 37e, 3a2, 4a2, 4e0, 4ee, 4f2, 4fc, 56f, 5a9, 5b7, 5e1, 5fa, 625, 67d, 6b0, 6be, 6bf, 6ec, 722, 769, 7a3, 7f0 (46 objects).
- **Attribute g:** True for objects 33, 52, 77, 9f, b1, dd, fa, 153, 155, 17a, 1b0, 1bc, 1d5, 1f5, 1fd, 25b, 29e, 2d1, 313, 33a, 35f, 37a, 37e, 392, 394, 396, 4de, 4f2, 4fc, 5b7, 5d8, 5fa, 67d, 6b0, 6be, 6bf, 7f0 (37 objects).
- **Attribute h:** True for objects 29, 4b, 9f, c9, cd, dd, fa, 10e, 17a, 1bc, 1ca, 1cb, 1cf, 1ec, 1fd, 228, 24a, 25b, 28f, 29e, 2eb, 33a, 35f, 37a, 37e, 3cf, 3e8, 40b, 418, 489, 4de, 4ee, 4fc, 509, 50b, 519, 56f, 5a9, 5d8, 5fa, 68a, 69d, 6be, 6bf, 6cf, 6ec, 71a, 769, 78f (49 objects).
- **Attribute i:** True for objects 77, 9f, cd, dd, f7, 10e, 155, 1bc, 1cf, 1d5, 1ec, 1f5, 1fd, 225, 284, 28f, 29e, 3cf, 3e6, 4de, 4ee, 4fc, 56f, 625, 67d, 69d, 6be, 6bf, 6cf, 6ec, 707, 71a, 78f, 7c4, 7c5 (35 objects).
- **Attribute j:** True for objects 33, 4b, 52, 63, 77, 9f, 10e, 153, 17a, 1ca, 1cb, 1cf, 24a, 25b, 262, 263, 28f, 29e, 3cf, 3e6, 40b, 4a2, 4de, 4ee, 4f2, 50b, 56f, 5fa, 68a, 697, 6be, 6bf, 707, 71a, 722, 78f, 7a3 (37 objects).
- **Attribute k:** True for objects 29, 33, 4b, 61, 63, 69, 77, 9f, b1, c9, cd, dd, e1, f7, 153, 155, 1cb, 1cf, 1d5, 1f5, 1fd, 225, 25b, 261, 263, 28f, 2d1, 2eb, 313, 35f, 381, 40b, 421, 489, 4c1, 509, 50b, 519, 56f, 5a9, 5b7, 5e1,

625, 67d, 69d, 6bf, 6cf, 707, 769, 78f, 7a3, 7c5 (52 objects).

Attributes **b**, **c**, **e**, **f**, **h**, and **k** have counts closest to 39 (half of 78). Attribute **b** (46 true) is slightly closer to an even split than **k** (52 true), so I'll start with:

**Question 1:** Does the hidden object have attribute **b** set to **true** ?

### Initial Belief Distribution

Before any answers, each of the 78 objects has an equal probability:

- Probability per object =  $1/78 \approx 0.0128$  (or  $\sim 1.28\%$ ).

Please answer the question (yes or no), and I'll update the belief distribution accordingly.

Yes.

Thank you for answering that the hidden object has attribute **b** set to **true** . This reduces the possible objects to those with **b = true** . From the dataset, there are 46 objects with **b = true** : 220, 225, 228, 24a, 25b, 261, 262, 263, 284, 28f, 29e, 2d1, 2eb, 300, 313, 33a, 35f, 37a, 37e, 381, 392, 394, 396, 3a2, 3cf, 3e6, 3e8, 625, 67d, 68a, 697, 69d, 6b0, 6be, 6bf, 6cf, 6ec, 707, 71a, 722, 769, 78f, 7a3, 7c4, 7c5, 7f0.

### Updated Belief Distribution

With 46 remaining objects, each has an equal probability:

- Probability per object =  $1/46 \approx 0.0217$  (or  $\sim 2.17\%$ ).

### Step 2: Choose the Next Question

To maximize information gain, I'll select an attribute that splits the 46 objects as evenly as possible. Let's count the **true** occurrences for each attribute among these objects:

- **a**: True for 625, 67d, 68a, 697, 69d, 6b0, 6be, 6bf, 6cf, 6ec, 707, 71a, 722, 769, 78f, 7a3, 7c4, 7c5, 7f0 (19 objects).
- **c**: True for 300, 313, 33a, 35f, 37a, 37e, 381, 392, 394, 396, 3a2, 3cf, 3e6, 3e8, 707, 71a, 722, 769, 78f, 7a3, 7c4, 7c5, 7f0 (23 objects).
- **d**: True for 284, 28f, 29e, 2d1, 2eb, 381, 392, 394, 396, 3a2, 3cf, 3e6, 3e8, 68a, 697, 69d, 6b0, 6be, 6bf, 6cf, 6ec, 78f, 7a3, 7c4, 7c5, 7f0 (26 objects).
- **e**: True for 24a, 25b, 261, 262, 263, 2d1, 2eb, 35f, 37a, 37e, 3cf, 3e6, 3e8, 6cf, 6ec, 769, 7c4, 7c5, 7f0 (19 objects).

- **f**: True for 220, 225, 228, 261, 262, 263, 2eb, 33a, 37a, 37e, 3a2, 6b0, 6be, 6bf, 6ec, 722, 769, 7a3, 7f0 (19 objects).
- **g**: True for 25b, 29e, 2d1, 313, 33a, 35f, 37a, 37e, 392, 394, 396, 6b0, 6be, 6bf, 7f0 (15 objects).
- **h**: True for 228, 24a, 25b, 28f, 29e, 2eb, 33a, 35f, 37a, 37e, 3cf, 3e8, 6be, 6bf, 6cf, 6ec, 71a, 769, 78f (19 objects).
- **i**: True for 225, 284, 28f, 29e, 3cf, 3e6, 625, 67d, 69d, 6be, 6bf, 6cf, 6ec, 707, 71a, 78f, 7c4, 7c5 (18 objects).
- **j**: True for 24a, 25b, 262, 263, 28f, 29e, 3a2, 3cf, 3e6, 33a, 35f, 37a, 37e, 697, 6be, 6bf, 707, 71a, 722, 78f, 7a3 (21 objects).
- **k**: True for 225, 25b, 261, 263, 28f, 2d1, 2eb, 313, 35f, 381, 625, 67d, 69d, 6bf, 6cf, 707, 769, 78f, 7a3, 7c5 (20 objects).

Attribute **d** (26 true, 20 false) is closest to an even split.

**Question 2:** Does the hidden object have attribute **d** set to **true** ?

### Current Belief Distribution

- Objects (46): 220, 225, 228, 24a, 25b, 261, 262, 263, 284, 28f, 29e, 2d1, 2eb, 300, 313, 33a, 35f, 37a, 37e, 381, 392, 394, 396, 3a2, 3cf, 3e6, 3e8, 625, 67d, 68a, 697, 69d, 6b0, 6be, 6bf, 6cf, 6ec, 707, 71a, 722, 769, 78f, 7a3, 7c4, 7c5, 7f0.
- Probability per object = ~2.17%.

Please answer the question (yes or no).

Yes.

Thank you for answering that the hidden object has attribute **d** set to **true** . Since the object also has **b** = **true** (from the previous answer), we now filter the 46 objects with **b** = **true** to those that also have **d** = **true** . From the previous list, the objects with both **b** = **true** and **d** = **true** are: 284, 28f, 29e, 2d1, 2eb, 381, 392, 394, 396, 3a2, 3cf, 3e6, 3e8, 68a, 697, 69d, 6b0, 6be, 6bf, 6cf, 6ec, 78f, 7a3, 7c4, 7c5, 7f0 (26 objects).

### Updated Belief Distribution

With 26 remaining objects, each has an equal probability:

- Probability per object =  $1/26 \approx 0.0385$  (or ~3.85%).

### Step 3: Choose the Next Question

To maximize information gain, I'll select an attribute that splits these 26 objects as evenly as possible. Let's count the **true** occurrences for each attribute among these objects:

- **a**: True for 68a, 697, 69d, 6b0, 6be, 6bf, 6cf, 6ec, 78f, 7a3, 7c4, 7c5, 7f0 (13 objects).
- **c**: True for 381, 392, 394, 396, 3a2, 3cf, 3e6, 3e8, 78f, 7a3, 7c4, 7c5, 7f0 (13 objects).
- **e**: True for 2d1, 2eb, 3cf, 3e6, 3e8, 6cf, 6ec, 7c4, 7c5, 7f0 (10 objects).
- **f**: True for 2eb, 3a2, 6b0, 6be, 6bf, 6ec, 7a3, 7f0 (8 objects).
- **g**: True for 29e, 2d1, 392, 394, 396, 6b0, 6be, 6bf, 7f0 (9 objects).
- **h**: True for 28f, 29e, 2eb, 3cf, 3e8, 6be, 6bf, 6cf, 6ec, 78f (10 objects).
- **i**: True for 284, 28f, 29e, 3cf, 3e6, 69d, 6be, 6bf, 6cf, 6ec, 78f, 7c4, 7c5 (13 objects).
- **j**: True for 28f, 29e, 3a2, 3cf, 3e6, 68a, 697, 6be, 6bf, 78f, 7a3 (11 objects).
- **k**: True for 28f, 2d1, 2eb, 381, 697, 69d, 6bf, 6cf, 78f, 7a3, 7c5 (11 objects).

Attributes **a**, **c**, and **i** (13 true each) split the objects exactly in half (13 true, 13 false). Attribute **c** is a good choice since it's a distinct attribute and maintains the even split.

**Question 3:** Does the hidden object have attribute **c** set to **true** ?

**Current Belief Distribution**

- Objects (26): 284, 28f, 29e, 2d1, 2eb, 381, 392, 394, 396, 3a2, 3cf, 3e6, 3e8, 68a, 697, 69d, 6b0, 6be, 6bf, 6cf, 6ec, 78f, 7a3, 7c4, 7c5, 7f0.
- Probability per object = ~3.85%.

Please answer the question (yes or no).

Yes.

Thank you for answering that the hidden object has attribute **c** set to **true** . Since the object also has **b** = **true** and **d** = **true** (from previous answers), we filter the 26 objects to those with **b** = **true** , **d** = **true** , and **c** = **true** . From the previous list, the objects with these attributes are: 381, 392, 394, 396, 3a2, 3cf, 3e6, 3e8, 78f, 7a3, 7c4, 7c5, 7f0 (13 objects).

**Updated Belief Distribution**

With 13 remaining objects, each has an equal probability:

- Probability per object = 1/13 ≈ 0.0769 (or ~7.69%).

**Step 4: Choose the Next Question**

To maximize information gain, I'll select an attribute that splits these 13 objects as evenly as possible. Let's count the **true** occurrences for each attribute among these objects:

- **a**: True for 78f, 7a3, 7c4, 7c5, 7f0 (5 objects).
- **e**: True for 3cf, 3e6, 3e8, 7c4, 7c5, 7f0 (6 objects).
- **f**: True for 3a2, 7a3, 7f0 (3 objects).
- **g**: True for 392, 394, 396, 7f0 (4 objects).
- **h**: True for 3cf, 3e8, 78f, 7c4, 7c5 (5 objects).
- **i**: True for 3cf, 3e6, 78f, 7c4, 7c5 (5 objects).
- **j**: True for 3a2, 3cf, 3e6, 78f, 7a3 (5 objects).
- **k**: True for 381, 78f, 7a3, 7c5 (4 objects).

Attribute **e** (6 true, 7 false) is closest to an even split.

**Question 4:** Does the hidden object have attribute **e** set to **true** ?

### Current Belief Distribution

- Objects (13): 381, 392, 394, 396, 3a2, 3cf, 3e6, 3e8, 78f, 7a3, 7c4, 7c5, 7f0.
- Probability per object = ~7.69%.

Please answer the question (yes or no).

Yes.

Thank you for answering that the hidden object has attribute **e** set to **true** . Since the object also has **b** = **true** , **d** = **true** , and **c** = **true** (from previous answers), we filter the 13 objects to those with **b** = **true** , **d** = **true** , **c** = **true** , and **e** = **true** . From the previous list, the objects with these attributes are: 3cf, 3e6, 3e8, 7c4, 7c5, 7f0 (6 objects).

### Updated Belief Distribution

With 6 remaining objects, each has an equal probability:

- Probability per object =  $1/6 \approx 0.1667$  (or ~16.67%).

### Step 5: Choose the Next Question

To maximize information gain, I'll select an attribute that splits these 6 objects as evenly as possible. Let's count the **true** occurrences for each attribute among these objects:

- **a**: True for 7c4, 7c5, 7f0 (3 objects).

- **f**: True for 7f0 (1 object).
- **g**: True for 7f0 (1 object).
- **h**: True for 3cf, 3e8, 7c4, 7c5 (4 objects).
- **i**: True for 3cf, 3e6, 7c4, 7c5 (4 objects).
- **j**: True for 3cf, 3e6 (2 objects).
- **k**: True for 7c5 (1 object).

Attributes **h** and **i** (4 true, 2 false each) provide the closest split to even.

**Question 5:** Does the hidden object have attribute **h** set to **true** ?

### Current Belief Distribution

- Objects (6): 3cf, 3e6, 3e8, 7c4, 7c5, 7f0.
- Probability per object = ~16.67%.

Please answer the question (yes or no).

No.

Thank you for answering that the hidden object has attribute **h** set to **false** . Since the object also has **b** = **true** , **d** = **true** , **c** = **true** , and **e** = **true** (from previous answers), we filter the 6 objects to those with **b** = **true** , **d** = **true** , **c** = **true** , **e** = **true** , and **h** = **false** . From the previous list (3cf, 3e6, 3e8, 7c4, 7c5, 7f0), the objects with **h** = **false** are:

- 3e6: {a: false, b: true, c: true, d: true, e: true, f: true, g: false, h: false, i: true, j: true, k: false}
- 7f0: {a: true, b: true, c: true, d: true, e: true, f: true, g: true, h: false, i: false, j: false, k: false}

(2 objects).

### Updated Belief Distribution

With 2 remaining objects, each has an equal probability:

- Probability per object (3e6, 7f0) =  $1/2 = 0.5$  (or 50%).

### Step 6: Choose the Next Question

To distinguish between 3e6 and 7f0, I'll compare their attributes:

- **3e6**: {a: false, b: true, c: true, d: true, e: true, f: true, g: false, h: false, i: true, j: true, k: false}
- **7f0**: {a: true, b: true, c: true, d: true, e: true, f: true, g: true, h: false, i: false, j: false, k: false}

Differences are in attributes **a**, **g**, **i**, and **j**. Any of these will split the objects. I'll choose **a** for simplicity.

**Question 6:** Does the hidden object have attribute **a** set to **true**?

### Current Belief Distribution

- Objects (2): 3e6 (~50%), 7f0 (~50%).

Please answer the question (yes or no).

You forgot one or more objects, like 7c5.

Apologies for the oversight. Let's correct the error. From the previous step, we had 6 objects with **b** = **true**, **d** = **true**, **c** = **true**, and **e** = **true**: 3cf, 3e6, 3e8, 7c4, 7c5, 7f0. You answered that the hidden object has **h** = **false**. Let's re-evaluate which of these objects have **h** = **false**:

- **3cf**: {a: false, b: true, c: true, d: true, e: true, f: false, g: false, h: true, i: true, j: true, k: true} → **h** = true (eliminated).
- **3e6**: {a: false, b: true, c: true, d: true, e: true, f: true, g: false, h: false, i: true, j: true, k: false} → **h** = false (keep).
- **3e8**: {a: false, b: true, c: true, d: true, e: true, f: true, g: false, h: true, i: false, j: false, k: false} → **h** = true (eliminated).
- **7c4**: {a: true, b: true, c: true, d: true, e: true, f: false, g: false, h: false, i: true, j: false, k: false} → **h** = false (keep).
- **7c5**: {a: true, b: true, c: true, d: true, e: true, f: false, g: false, h: false, i: true, j: false, k: true} → **h** = false (keep).
- **7f0**: {a: true, b: true, c: true, d: true, e: true, f: true, g: true, h: false, i: false, j: false, k: false} → **h** = false (keep).

The objects with **h** = **false** are: 3e6, 7c4, 7c5, 7f0 (4 objects, not 2 as previously stated).

### Updated Belief Distribution

With 4 remaining objects, each has an equal probability:

- Probability per object (3e6, 7c4, 7c5, 7f0) =  $1/4 = 0.25$  (or 25%).

### Step 6: Choose the Next Question

To maximize information gain, I'll select an attribute that splits these 4 objects as evenly as possible. Let's compare their attributes:

- **3e6**: {a: false, b: true, c: true, d: true, e: true, f: true, g: false, h: false, i: true, j: true, k: false}
- **7c4**: {a: true, b: true, c: true, d: true, e: true, f: false, g: false, h: false, i: true, j: false, k: false}
- **7c5**: {a: true, b: true, c: true, d: true, e: true, f: false, g: false, h: false, i: true, j: false, k: true}
- **7f0**: {a: true, b: true, c: true, d: true, e: true, f: true, g: true, h: false, i: false, j: false, k: false}

Count the **true** occurrences for each undecided attribute:

- **a**: True for 7c4, 7c5, 7f0 (3 objects).
- **f**: True for 3e6, 7f0 (2 objects).
- **g**: True for 7f0 (1 object).
- **i**: True for 3e6, 7c4, 7c5 (3 objects).
- **j**: True for 3e6 (1 object).
- **k**: True for 7c5 (1 object).

Attribute **f** (2 true, 2 false) provides an even split.

**Question 6**: Does the hidden object have attribute **f** set to **true** ?

### Current Belief Distribution

- Objects (4): 3e6 (25%), 7c4 (25%), 7c5 (25%), 7f0 (25%).

Please answer the question (yes or no).

No.

Thank you for answering that the hidden object has attribute **f** set to **false** . Since the object also has **b** = **true** , **d** = **true** , **c** = **true** , **e** = **true** , and **h** = **false** (from previous answers), we filter the 4 objects (3e6, 7c4, 7c5, 7f0) to those with **f** = **false** . From the previous list:

- **3e6**: {a: false, b: true, c: true, d: true, e: true, f: true, g: false, h: false, i: true, j: true, k: false} → **f** = true (eliminated).
- **7c4**: {a: true, b: true, c: true, d: true, e: true, f: false, g: false, h: false, i: true, j: false, k: false} → **f** = false (keep).
- **7c5**: {a: true, b: true, c: true, d: true, e: true, f: false, g: false, h: false, i: true, j: false, k: true} → **f** = false (keep).
- **7f0**: {a: true, b: true, c: true, d: true, e: true, f: true, g: true, h: false, i: false, j: false, k: false} → **f** = true (eliminated).

The remaining objects are: 7c4, 7c5 (2 objects).



## Updated Belief Distribution

With 2 remaining objects, each has an equal probability:

- Probability per object ( $7c4, 7c5$ ) =  $1/2 = 0.5$  (or 50%).

## Step 7: Choose the Next Question

To distinguish between  $7c4$  and  $7c5$ , let's compare their attributes:

- **7c4**: {a: true, b: true, c: true, d: true, e: true, f: false, g: false, h: false, i: true, j: false, k: false}
- **7c5**: {a: true, b: true, c: true, d: true, e: true, f: false, g: false, h: false, i: true, j: false, k: true}

The only difference is in attribute **k** (false for  $7c4$ , true for  $7c5$ ).

**Question 7:** Does the hidden object have attribute **k** set to **true** ?

## Current Belief Distribution

- Objects (2):  $7c4$  (50%),  $7c5$  (50%).

Please answer the question (yes or no).

Yes.

Thank you for answering that the hidden object has attribute **k** set to **true** . Since the object also has **b** = **true** , **d** = **true** , **c** = **true** , **e** = **true** , **h** = **false** , and **f** = **false** (from previous answers), we filter the 2 remaining objects ( $7c4, 7c5$ ) to those with **k** = **true** :

- **7c4**: {a: true, b: true, c: true, d: true, e: true, f: false, g: false, h: false, i: true, j: false, k: false} → **k** = false (eliminated).
- **7c5**: {a: true, b: true, c: true, d: true, e: true, f: false, g: false, h: false, i: true, j: false, k: true} → **k** = true (keep).

The only remaining object is **7c5**.

## Final Belief Distribution

- Object  $7c5$ : Probability = 1.0 (100%).
- All other objects: Probability = 0.0 (0%).

## Conclusion

The hidden object is **7c5**, with attributes {a: true, b: true, c: true, d: true, e: true, f: false, g: false, h: false, i: true, j: false, k: true}. Since we've identified a single object, there are no more distinguishing attributes to consider, and we can stop here.

If you confirm this is correct, we're done! If you believe there's an error, please let me know, and we can review the process.

     ... 1s
